# Supplementary material for: Expression and integrated network analyses revealed functional divergence of NHX-type Na+/H+ exchanger genes in poplar
Source: Sci Rep. 2017 Jun 1;7:2607. doi: 10.1038/s41598-017-02894-8 (PMC5453932; doi:10.1038/s41598-017-02894-8)
Supplement: Supplementary file 4 — Supplementary data [file 41598_2017_2894_MOESM4_ESM.pdf]

## **Supplementary Information**

### **Expression and integrated network analyses revealed functional divergence of NHX-type Na<sup>+</sup>/H<sup>+</sup> exchanger genes in poplar**

**Fengxia Tian<sup>1,2</sup>, Ermei Chang<sup>2</sup>, Yu Li<sup>2</sup>, Pei Sun<sup>2</sup>, Jianjun Hu<sup>2,\*</sup>, Jin Zhang<sup>2,\*</sup>**

1. College of Life Science and Technology, Nanyang Normal University, Nanyang, Henan 473061, P.R. China;
2. State Key Laboratory of Tree Genetics and Breeding, Key Laboratory of Tree Breeding and Cultivation of the State Forestry Administration, Research Institute of Forestry, Chinese Academy of Forestry, Beijing 100091, P.R. China;

† These authors contributed equally to this work.

\* To whom correspondence should be addressed. Tel. +86 (10) 6288 8862. Fax. +86 (10) 6287 2015. Email: hujj@caf.ac.cn (J.H.) and zhang007jin@163.com (J.Z.).

The three cloned *PtNHXs* (-1, -6, and -8) showed 99.45%, 99.57%, and 99.54% identities with their corresponding CDS sequences from the *P. trichocarpa* genome database, respectively.

**PtNHX1**

## Nucleotide

**Identity = 99.45%**

**Amino acid**

**Identity = 98.9%**

**Figure S1 continue**

**PtNHX6**

## Nucleotide

**Identity = 99.57%**

[illegible]

**Amino acid**

**Identity = 99.81%**

|                    |                                                                                                        |     |
|--------------------|--------------------------------------------------------------------------------------------------------|-----|
| Potri.016G000206.1 | MSVVEELINQMGSPAGGGSSQSGPFGGQQAAGVLTQIMVILSVGHVLRARHAYFYFLERASASLIGVGAANIENPETSIRAKINFRHKPFPT           | 100 |
| PtNMX6_cloned      | MSVVEELINQMGSPAGGGSSQSGPFGGQQAAGVLTQIMVILSVGHVLRARHAYFYFLERASASLIGVGAANIENPETSIRAKINFRHKPFPT           | 99  |
| Consensus          | msvveelinmgspagggssqsgpfgqqaagvlltqlmvlsvghvrlrhrfyflpeasasiliglvgalanisatetsirawfllhefff              |     |
| Potri.016G000206.1 | ILFLPPLTPQSGFRLSKPFRFSKGAIVTFRSLGITFASVVTGVVTVLGLITLVNRPVPIFGALISATPVTULSRFORGLDNLVALVPSGV             | 200 |
| PtNMX6_cloned      | ILFLPPLTPQSGFRLSKPFRFSKGAIVTFRSLGITFASVVTGVVTVLGLITLVNRPVPIFGALISATPVTULSRFORGLDNLVALVPSGV             | 99  |
| Consensus          | ilflppltpqsgfslskpfrrfskgaivtfrslglitfasvvtgvvltvlglitlvnrpvpifgalsatpvtulsrforglidnlvalvpsgv          |     |
| Potri.016G000206.1 | DLNLAHSLDYRLHSSLKSHAPGQNFHKVYVERELIVGSSAGVGVPFALLYFAGSLDLDNLGLDECLFVDFPFSFMLABELCIVGLVLPFGV            | 300 |
| PtNMX6_cloned      | DLNLAHSLDYRLHSSLKSHAPGQNFHKVYVERELIVGSSAGVGVPFALLYFAGSLDLDNLGLDECLFVDFPFSFMLABELCIVGLVLPFGV            | 299 |
| Consensus          | ldnlaahsllyrslhsslkshapgnfhkmvifrlrlivgssagvgvflsaliklyagddlnldnqldeclfvdfpfsfmlaelgclivglvlpfgv       |     |
| Potri.016G000206.1 | NKHYYVNTSISFNSQIFVSAPFFHTISSTAFITFVPTVMGPDIAHQSHQSHVGFSTFSTFIVGARAAVNFSCAYVIAVNPAPQTPVYHQVAYSGTAG      | 400 |
| PtNMX6_cloned      | NKHYYVNTSISFNSQIFVSAPFFHTISSTAFITFVPTVMGPDIAHQSHQSHVGFSTFSTFIVGARAAVNFSCAYVIAVNPAPQTPVYHQVAYSGTAG      | 399 |
| Consensus          | nkhyyntslsfnseqifvsapffhtisstafitfvptvmgpdiahqshqshvgtfstfstfivgaraaavfscayvlnvpsaprqtpvphkqalvaysgtag |     |
| Potri.016G000206.1 | APAALATQSVHLPFSGHGCTPTACTATLAVLTLYTGSGTGVIKTTQVWGDPDGFPLSSSTLGNNGVYVPSVNDATSGVNLKMKKEPKFKSTASPTA       | 500 |
| PtNMX6_cloned      | APAALATQSVHLPFSGHGCTPTACTATLAVLTLYTGSGTGVIKTTQVWGDPDGFPLSSSTLGNNGVYVPSVNDATSGVNLKMKKEPKFKSTASPTA       | 499 |
| Consensus          | apaalaqsvhlpfsghgcltptactatlavlvtlytgsgtgviiktqvwgdpdgfplssstlgnngvyvpsvndatsgvnlkmkkepkfkstaspta      |     |
| Potri.016G000206.1 | LDKNYILPFPFSQNGDEBDDHDPFSSSRGRGFLGH                                                                    | 536 |
| PtNMX6_cloned      | LDKNYILPFPFSQNGDEBDDHDPFSSSRGRGFLGH                                                                    | 535 |
| Consensus          | ldrnyiltpfptsqngddcchdpsssrgrgflgh                                                                     |     |

## Figure S1 continue

### PtNHX8

#### Nucleotide

Identity = 99.54%

|                      |       |
|----------------------|-------|
| PtNHX8 (109010900.1) | 100   |
| PTNHX8 cloned        | 100   |
| Consensus            |       |
| PtNHX8 (109010900.1) | 800   |
| PTNHX8 cloned        | 800   |
| Consensus            |       |
| PtNHX8 (109010900.1) | 1400  |
| PTNHX8 cloned        | 1400  |
| Consensus            |       |
| PtNHX8 (109010900.1) | 1600  |
| PTNHX8 cloned        | 1600  |
| Consensus            |       |
| PtNHX8 (109010900.1) | 1800  |
| PTNHX8 cloned        | 1800  |
| Consensus            |       |
| PtNHX8 (109010900.1) | 2000  |
| PTNHX8 cloned        | 2000  |
| Consensus            |       |
| PtNHX8 (109010900.1) | 2200  |
| PTNHX8 cloned        | 2200  |
| Consensus            |       |
| PtNHX8 (109010900.1) | 2400  |
| PTNHX8 cloned        | 2400  |
| Consensus            |       |
| PtNHX8 (109010900.1) | 2600  |
| PTNHX8 cloned        | 2600  |
| Consensus            |       |
| PtNHX8 (109010900.1) | 2800  |
| PTNHX8 cloned        | 2800  |
| Consensus            |       |
| PtNHX8 (109010900.1) | 3000  |
| PTNHX8 cloned        | 3000  |
| Consensus            |       |
| PtNHX8 (109010900.1) | 3200  |
| PTNHX8 cloned        | 3200  |
| Consensus            |       |
| PtNHX8 (109010900.1) | 3400  |
| PTNHX8 cloned        | 3400  |
| Consensus            |       |
| PtNHX8 (109010900.1) | 3600  |
| PTNHX8 cloned        | 3600  |
| Consensus            |       |
| PtNHX8 (109010900.1) | 3800  |
| PTNHX8 cloned        | 3800  |
| Consensus            |       |
| PtNHX8 (109010900.1) | 4000  |
| PTNHX8 cloned        | 4000  |
| Consensus            |       |
| PtNHX8 (109010900.1) | 4200  |
| PTNHX8 cloned        | 4200  |
| Consensus            |       |
| PtNHX8 (109010900.1) | 4400  |
| PTNHX8 cloned        | 4400  |
| Consensus            |       |
| PtNHX8 (109010900.1) | 4600  |
| PTNHX8 cloned        | 4600  |
| Consensus            |       |
| PtNHX8 (109010900.1) | 4800  |
| PTNHX8 cloned        | 4800  |
| Consensus            |       |
| PtNHX8 (109010900.1) | 5000  |
| PTNHX8 cloned        | 5000  |
| Consensus            |       |
| PtNHX8 (109010900.1) | 5200  |
| PTNHX8 cloned        | 5200  |
| Consensus            |       |
| PtNHX8 (109010900.1) | 5400  |
| PTNHX8 cloned        | 5400  |
| Consensus            |       |
| PtNHX8 (109010900.1) | 5600  |
| PTNHX8 cloned        | 5600  |
| Consensus            |       |
| PtNHX8 (109010900.1) | 5800  |
| PTNHX8 cloned        | 5800  |
| Consensus            |       |
| PtNHX8 (109010900.1) | 6000  |
| PTNHX8 cloned        | 6000  |
| Consensus            |       |
| PtNHX8 (109010900.1) | 6200  |
| PTNHX8 cloned        | 6200  |
| Consensus            |       |
| PtNHX8 (109010900.1) | 6400  |
| PTNHX8 cloned        | 6400  |
| Consensus            |       |
| PtNHX8 (109010900.1) | 6600  |
| PTNHX8 cloned        | 6600  |
| Consensus            |       |
| PtNHX8 (109010900.1) | 6800  |
| PTNHX8 cloned        | 6800  |
| Consensus            |       |
| PtNHX8 (109010900.1) | 7000  |
| PTNHX8 cloned        | 7000  |
| Consensus            |       |
| PtNHX8 (109010900.1) | 7200  |
| PTNHX8 cloned        | 7200  |
| Consensus            |       |
| PtNHX8 (109010900.1) | 7400  |
| PTNHX8 cloned        | 7400  |
| Consensus            |       |
| PtNHX8 (109010900.1) | 7600  |
| PTNHX8 cloned        | 7600  |
| Consensus            |       |
| PtNHX8 (109010900.1) | 7800  |
| PTNHX8 cloned        | 7800  |
| Consensus            |       |
| PtNHX8 (109010900.1) | 8000  |
| PTNHX8 cloned        | 8000  |
| Consensus            |       |
| PtNHX8 (109010900.1) | 8200  |
| PTNHX8 cloned        | 8200  |
| Consensus            |       |
| PtNHX8 (109010900.1) | 8400  |
| PTNHX8 cloned        | 8400  |
| Consensus            |       |
| PtNHX8 (109010900.1) | 8600  |
| PTNHX8 cloned        | 8600  |
| Consensus            |       |
| PtNHX8 (109010900.1) | 8800  |
| PTNHX8 cloned        | 8800  |
| Consensus            |       |
| PtNHX8 (109010900.1) | 9000  |
| PTNHX8 cloned        | 9000  |
| Consensus            |       |
| PtNHX8 (109010900.1) | 9200  |
| PTNHX8 cloned        | 9200  |
| Consensus            |       |
| PtNHX8 (109010900.1) | 9400  |
| PTNHX8 cloned        | 9400  |
| Consensus            |       |
| PtNHX8 (109010900.1) | 9600  |
| PTNHX8 cloned        | 9600  |
| Consensus            |       |
| PtNHX8 (109010900.1) | 9800  |
| PTNHX8 cloned        | 9800  |
| Consensus            |       |
| PtNHX8 (109010900.1) | 10000 |
| PTNHX8 cloned        | 10000 |
| Consensus            |       |

#### Amino acid

Identity = 99.39%

|                      |      |
|----------------------|------|
| PtNHX8 (109010900.1) | 100  |
| PTNHX8 cloned        | 99   |
| Consensus            |      |
| PtNHX8 (109010900.1) | 200  |
| PTNHX8 cloned        | 199  |
| Consensus            |      |
| PtNHX8 (109010900.1) | 300  |
| PTNHX8 cloned        | 299  |
| Consensus            |      |
| PtNHX8 (109010900.1) | 400  |
| PTNHX8 cloned        | 399  |
| Consensus            |      |
| PtNHX8 (109010900.1) | 500  |
| PTNHX8 cloned        | 499  |
| Consensus            |      |
| PtNHX8 (109010900.1) | 600  |
| PTNHX8 cloned        | 599  |
| Consensus            |      |
| PtNHX8 (109010900.1) | 700  |
| PTNHX8 cloned        | 699  |
| Consensus            |      |
| PtNHX8 (109010900.1) | 800  |
| PTNHX8 cloned        | 799  |
| Consensus            |      |
| PtNHX8 (109010900.1) | 900  |
| PTNHX8 cloned        | 899  |
| Consensus            |      |
| PtNHX8 (109010900.1) | 1000 |
| PTNHX8 cloned        | 999  |
| Consensus            |      |
| PtNHX8 (109010900.1) | 1100 |
| PTNHX8 cloned        | 1099 |
| Consensus            |      |
| PtNHX8 (109010900.1) | 1146 |
| PTNHX8 cloned        | 1145 |
| Consensus            |      |

**Figure S2. *Arabidopsis* NHX map position and duplication analysis.**

(A) Schematic representation of *Arabidopsis* chromosomes showing the location of *AtNHX* genes.

(B) The duplicated *AtNHX* genes (red labelled) on *Arabidopsis* chromosomes.

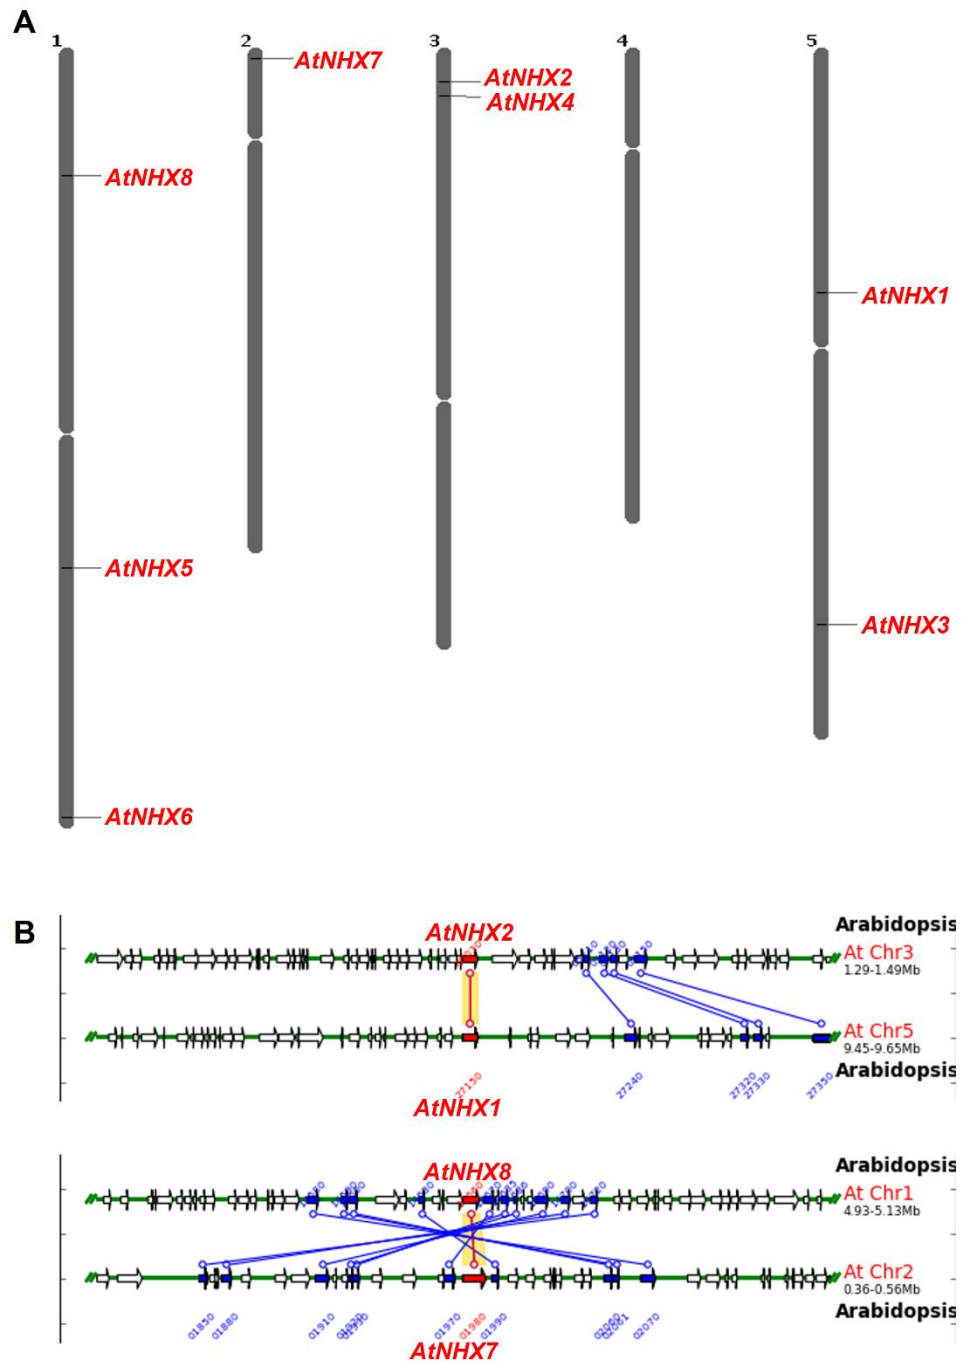

**Figure S3. Sliding window analysis of duplicated *PtNHXs*.**

The window size 60 and 90 bp were used for *Ka/Ks* analysis. The sequence identities and TM regions were shown in bottom of each figure.

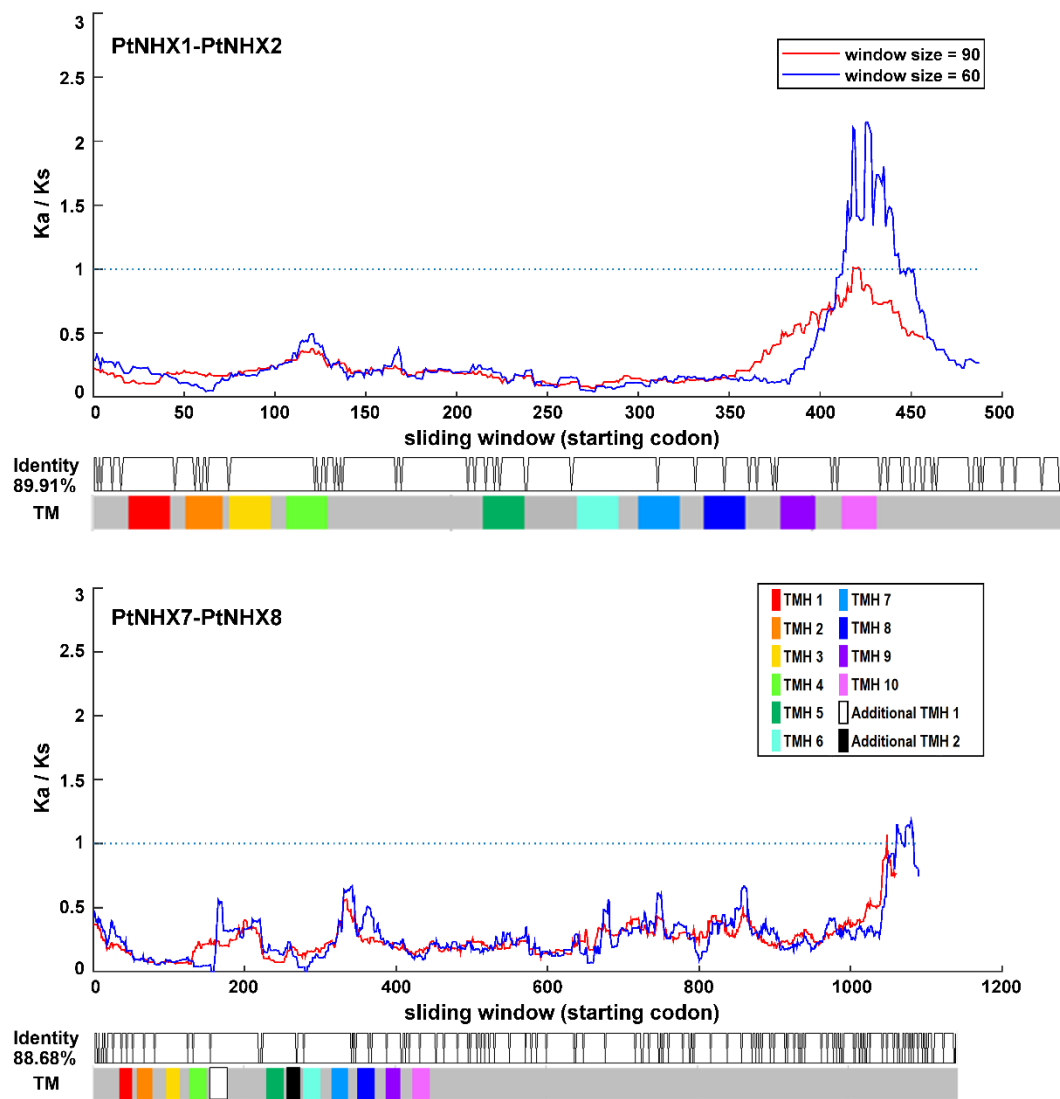

**Figure S4. Details of motifs in AtNHXs and PtNHXs identified by MEME.**

|     |  | <i>E</i> -value | Sites | Width |
|-----|--|-----------------|-------|-------|
| 1.  |  | 2.6e-307        | 16    | 41    |
| 2.  |  | 1.2e-293        | 16    | 41    |
| 3.  |  | 2.8e-202        | 16    | 29    |
| 4.  |  | 2.8e-173        | 7     | 50    |
| 5.  |  | 3.7e-179        | 9     | 36    |
| 6.  |  | 5.8e-200        | 12    | 41    |
| 7.  |  | 1.4e-136        | 16    | 21    |
| 8.  |  | 2.6e-190        | 9     | 50    |
| 9.  |  | 8.4e-147        | 9     | 50    |
| 10. |  | 4.7e-125        | 16    | 21    |
| 11. |  | 5.3e-137        | 16    | 32    |
| 12. |  | 5.6e-075        | 4     | 50    |
| 13. |  | 5.0e-073        | 4     | 50    |
| 14. |  | 3.1e-071        | 4     | 50    |
| 15. |  | 2.6e-067        | 4     | 49    |

**Figure S5. Multiple sequence alignment and transmembrane region of PtNHXs.**

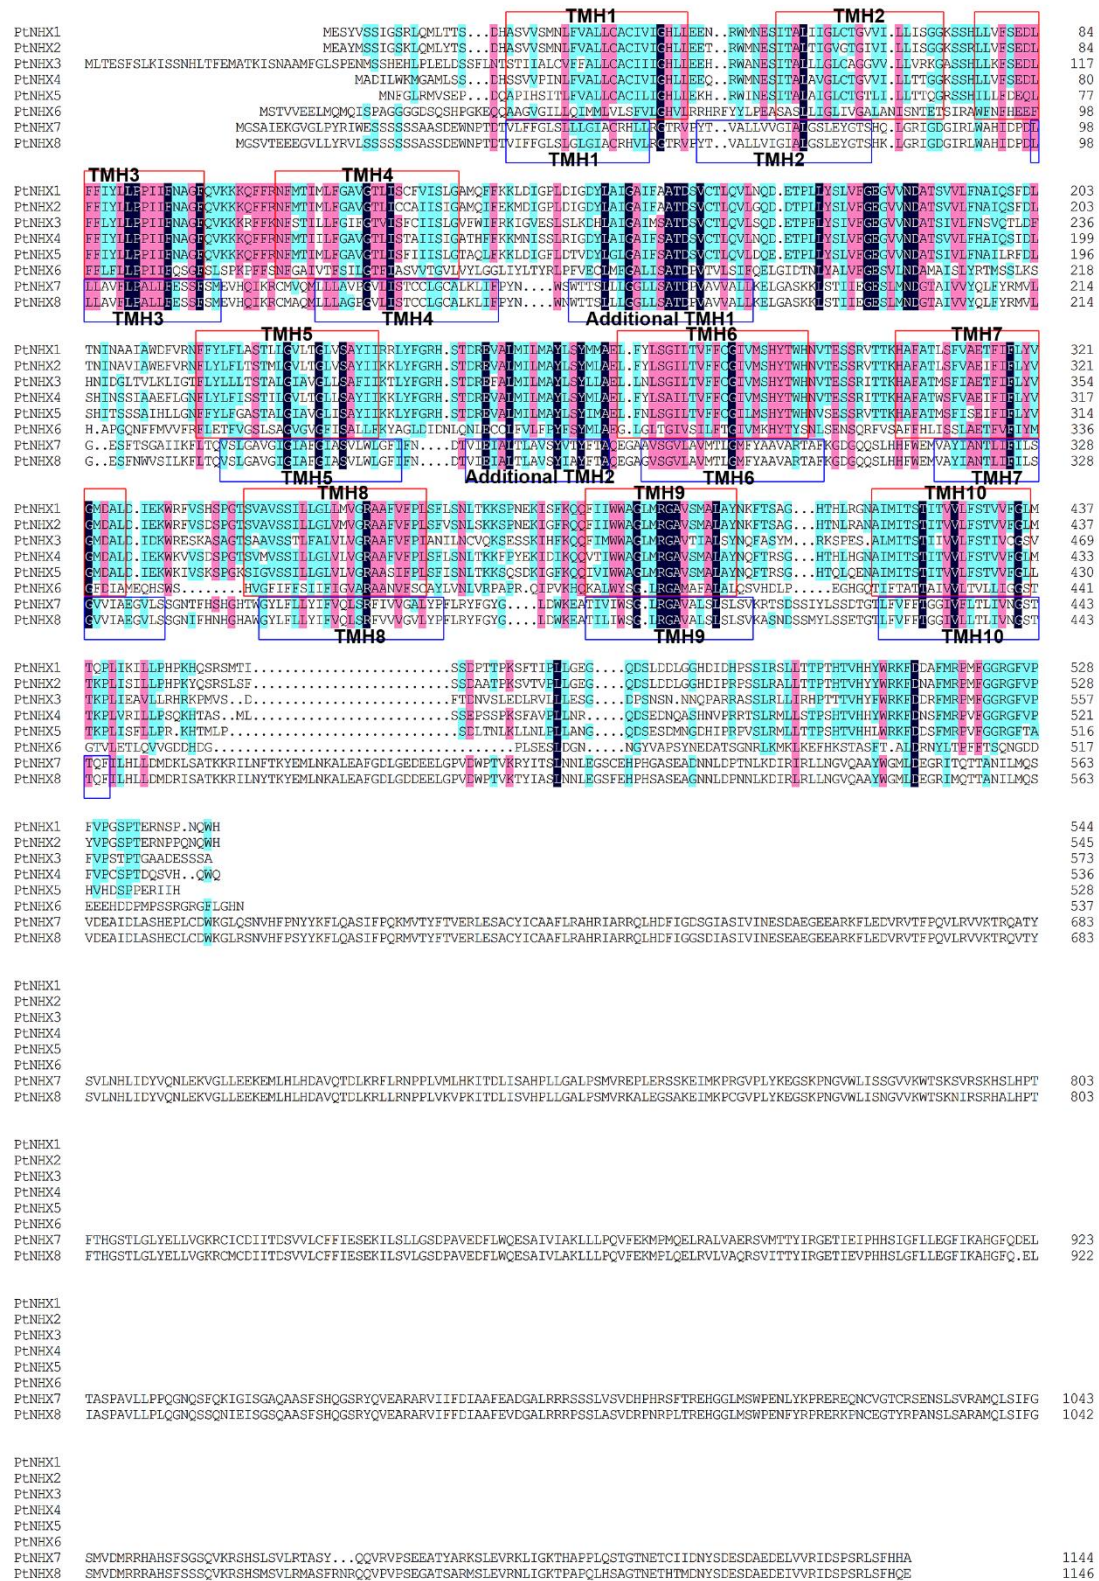

**Figure S6. Details of secondary structure of PtNHX proteins.**

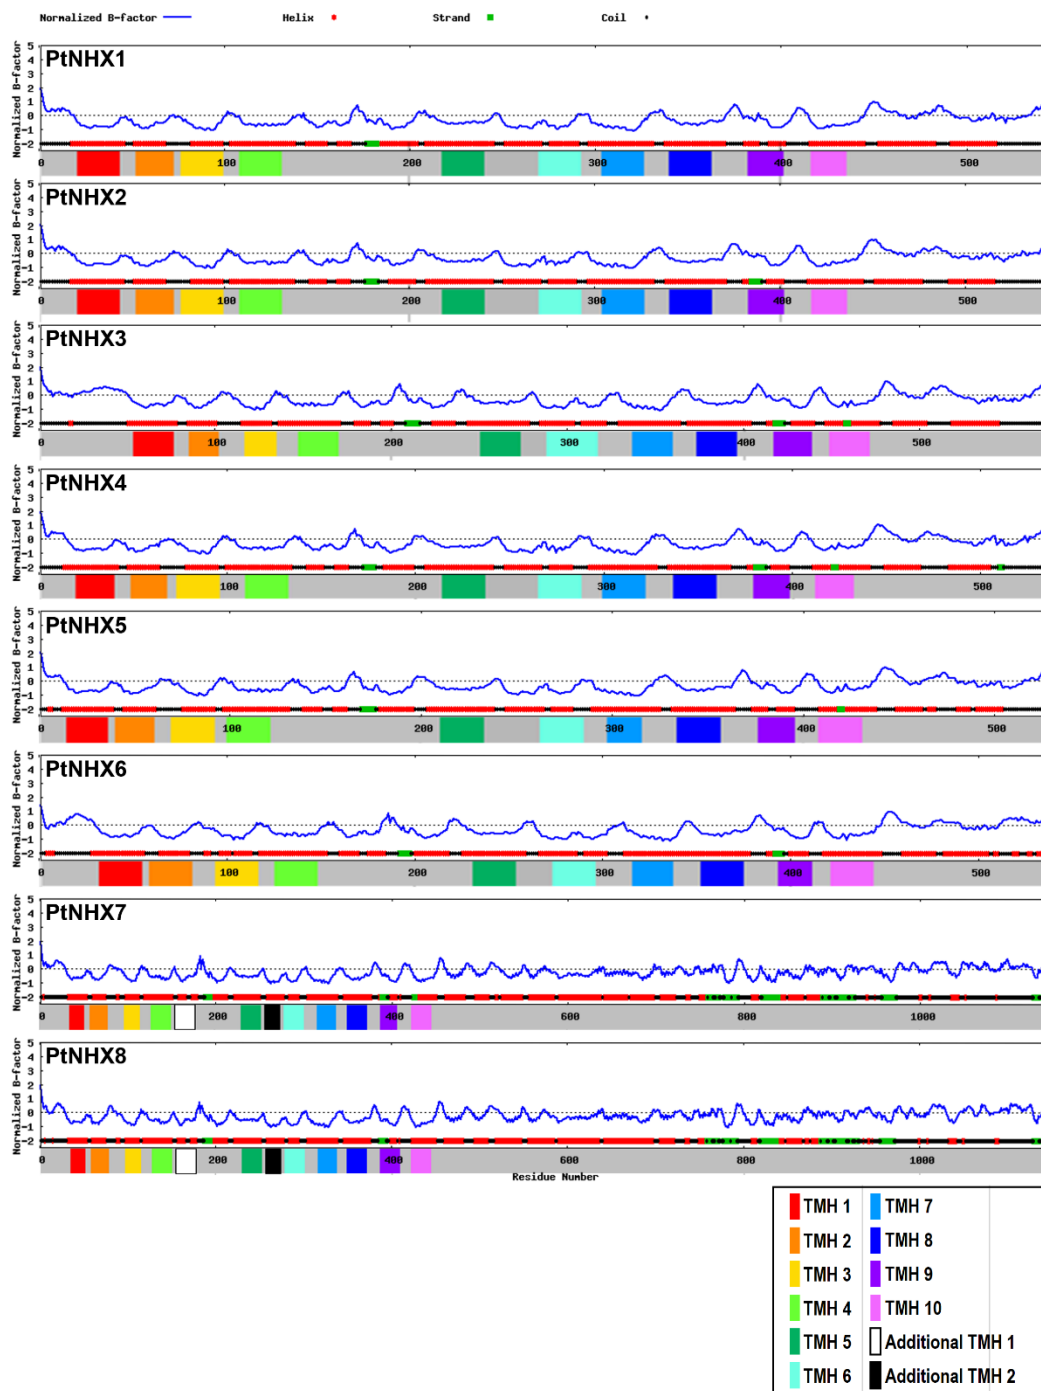

**Figure S7. Expression patterns of *Arabidopsis* NHX genes across different tissues.**

The data was obtained from AtGenExpress Visualization Tool (<http://weigelworld.org/resources>).

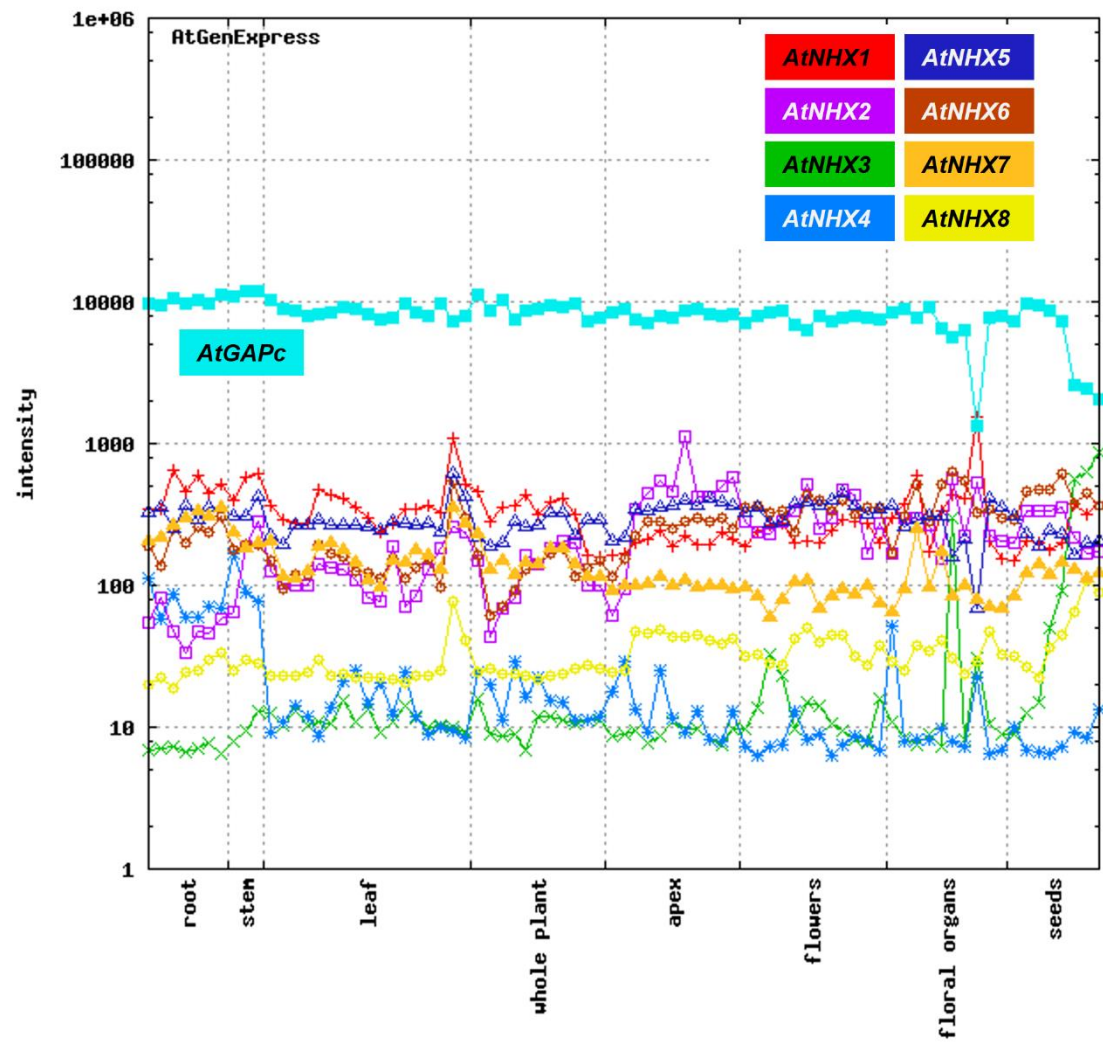

**Figure S8. Expression patterns of *Arabidopsis* *NHX* genes under various abiotic stresses.**

The microarray data was obtained from AtGenExpress Visualization Tool. Red means highly expression and green indicates low expression.

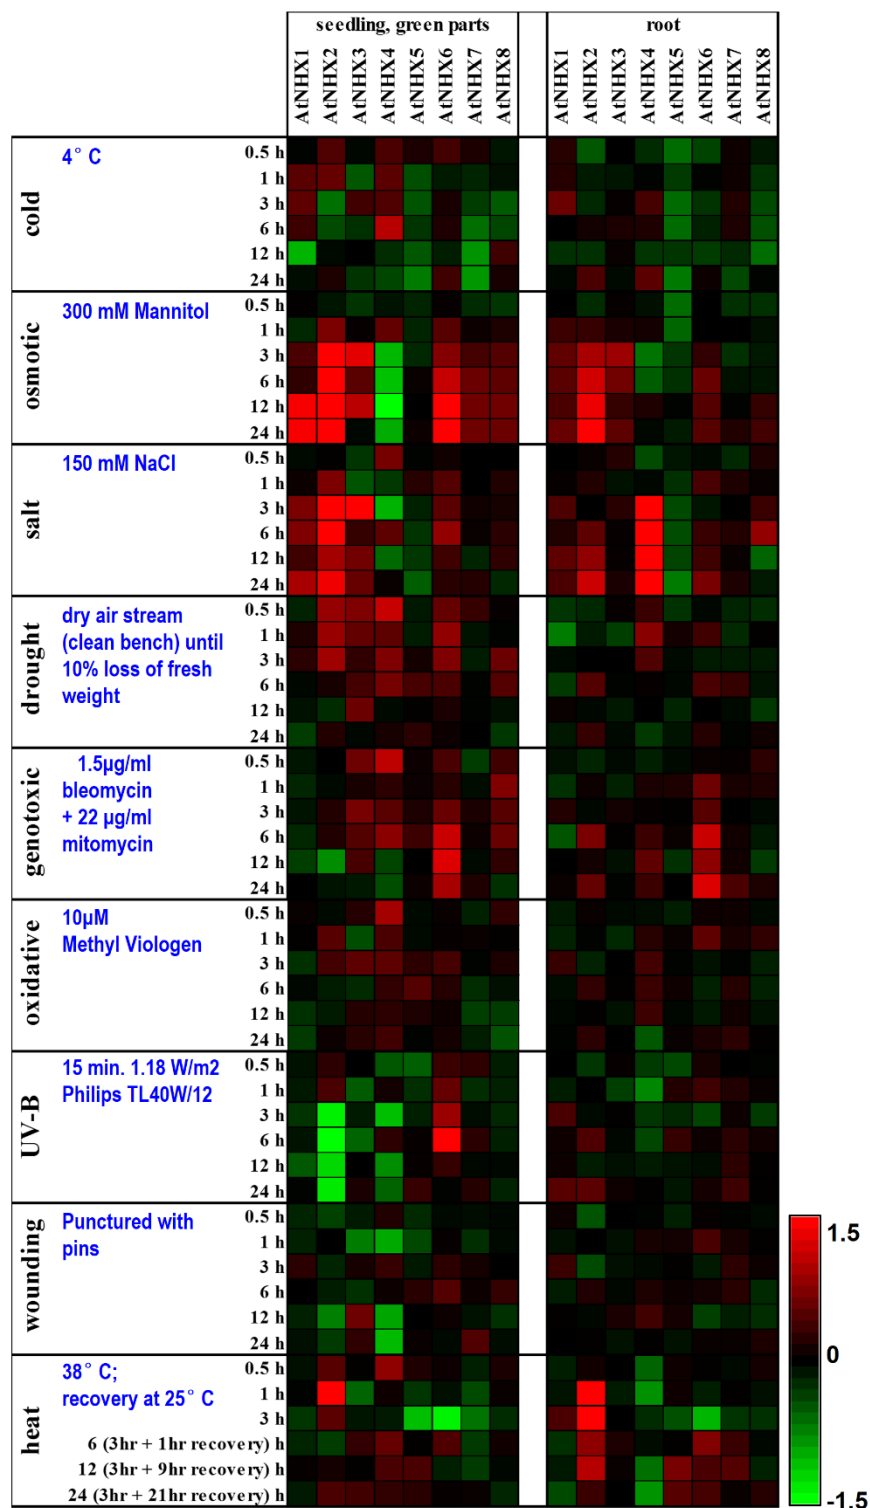

**Figure S9. GO enrichment analysis of genes co-expressed with *PtNHXs*.**

**Enriched GO terms of all genes co-expressed with eight *PtNHXs*:**

| GO_acc     | Type | Term                                                                                | Gene | FDR     | GO enrichment |
|------------|------|-------------------------------------------------------------------------------------|------|---------|---------------|
| GO:0080090 | BP   | regulation of primary metabolic process                                             | 73   | 1.4E-06 | 1.98          |
| GO:0009889 | BP   | regulation of biosynthetic process                                                  | 73   | 1.4E-06 | 1.99          |
| GO:0016070 | BP   | RNA metabolic process                                                               | 87   | 1.4E-06 | 1.84          |
| GO:0006355 | BP   | regulation of transcription, DNA-dependent                                          | 73   | 1.4E-06 | 2.01          |
| GO:0006350 | BP   | transcription                                                                       | 78   | 1.4E-06 | 1.96          |
| GO:0006351 | BP   | transcription, DNA-dependent                                                        | 78   | 1.4E-06 | 1.96          |
| GO:0032774 | BP   | RNA biosynthetic process                                                            | 78   | 1.4E-06 | 1.96          |
| GO:0051252 | BP   | regulation of RNA metabolic process                                                 | 73   | 1.4E-06 | 2.01          |
| GO:0031326 | BP   | regulation of cellular biosynthetic process                                         | 73   | 1.4E-06 | 1.99          |
| GO:0031323 | BP   | regulation of cellular metabolic process                                            | 74   | 1.4E-06 | 1.97          |
| GO:0045449 | BP   | regulation of transcription                                                         | 73   | 1.4E-06 | 2.01          |
| GO:0010556 | BP   | regulation of macromolecule biosynthetic process                                    | 73   | 1.4E-06 | 1.99          |
| GO:0019219 | BP   | regulation of nucleobase, nucleoside, nucleotide and nucleic acid metabolic process | 73   | 1.4E-06 | 2.00          |
| GO:0051171 | BP   | regulation of nitrogen compound metabolic process                                   | 73   | 1.4E-06 | 2.00          |
| GO:0010468 | BP   | regulation of gene expression                                                       | 73   | 1.6E-06 | 1.97          |
| GO:0060255 | BP   | regulation of macromolecule metabolic process                                       | 73   | 1.8E-06 | 1.96          |
| GO:0019222 | BP   | regulation of metabolic process                                                     | 74   | 2.0E-06 | 1.94          |
| GO:0050794 | BP   | regulation of cellular process                                                      | 83   | 1.2E-03 | 1.56          |
| GO:0006357 | BP   | regulation of transcription from RNA polymerase II promoter                         | 6    | 1.2E-03 | 11.22         |
| GO:0006139 | BP   | nucleobase, nucleoside, nucleotide and nucleic acid metabolic process               | 93   | 1.3E-03 | 1.51          |
| GO:0006366 | BP   | transcription from RNA polymerase II promoter                                       | 7    | 1.5E-03 | 8.14          |
| GO:0050789 | BP   | regulation of biological process                                                    | 83   | 1.8E-03 | 1.54          |
| GO:0065007 | BP   | biological regulation                                                               | 83   | 6.0E-03 | 1.48          |
| GO:0006807 | BP   | nitrogen compound metabolic process                                                 | 98   | 1.0E-02 | 1.40          |
| GO:0034645 | BP   | cellular macromolecule biosynthetic process                                         | 89   | 1.2E-02 | 1.42          |
| GO:0009059 | BP   | macromolecule biosynthetic process                                                  | 89   | 1.2E-02 | 1.41          |
| GO:0010467 | BP   | gene expression                                                                     | 86   | 1.4E-02 | 1.42          |
| GO:0044260 | BP   | cellular macromolecule metabolic process                                            | 166  | 1.5E-02 | 1.25          |
| GO:0043170 | BP   | macromolecule metabolic process                                                     | 178  | 4.3E-02 | 1.21          |
| GO:0005515 | MF   | protein binding                                                                     | 160  | 1.3E-09 | 1.70          |
| GO:0005488 | MF   | binding                                                                             | 365  | 2.0E-09 | 1.25          |
| GO:0003676 | MF   | nucleic acid binding                                                                | 125  | 8.9E-07 | 1.66          |
| GO:0030528 | MF   | transcription regulator activity                                                    | 57   | 4.4E-06 | 2.21          |
| GO:0008270 | MF   | zinc ion binding                                                                    | 44   | 2.5E-05 | 2.36          |
| GO:0003702 | MF   | RNA polymerase II transcription factor activity                                     | 8    | 1.0E-03 | 8.19          |
| GO:0016455 | MF   | RNA polymerase II transcription mediator activity                                   | 6    | 1.8E-03 | 11.73         |
| GO:0043565 | MF   | sequence-specific DNA binding                                                       | 29   | 2.5E-03 | 2.30          |
| GO:0016251 | MF   | general RNA polymerase II transcription factor activity                             | 6    | 3.1E-03 | 9.93          |
| GO:0003700 | MF   | transcription factor activity                                                       | 35   | 4.7E-03 | 2.01          |
| GO:0003677 | MF   | DNA binding                                                                         | 77   | 6.0E-03 | 1.52          |
| GO:0016592 | CC   | mediator complex                                                                    | 6    | 3.8E-03 | 11.73         |
| GO:0044428 | CC   | nuclear part                                                                        | 10   | 7.6E-03 | 4.06          |
| GO:0005654 | CC   | nucleoplasm                                                                         | 7    | 7.6E-03 | 5.90          |
| GO:0005634 | CC   | nucleus                                                                             | 41   | 7.6E-03 | 1.85          |
| GO:0044451 | CC   | nucleoplasm part                                                                    | 7    | 7.6E-03 | 5.90          |
| GO:0031981 | CC   | nuclear lumen                                                                       | 7    | 1.3E-02 | 5.19          |
| GO:0043231 | CC   | intracellular membrane-bounded organelle                                            | 49   | 2.8E-02 | 1.55          |
| GO:0043233 | CC   | organelle lumen                                                                     | 7    | 2.8E-02 | 4.07          |
| GO:0043227 | CC   | membrane-bounded organelle                                                          | 49   | 2.8E-02 | 1.54          |
| GO:0070013 | CC   | intracellular organelle lumen                                                       | 7    | 2.8E-02 | 4.07          |
| GO:0031974 | CC   | membrane-enclosed lumen                                                             | 7    | 4.6E-02 | 3.63          |

### Enriched BP terms of all genes co-expressed with eight *PtNHXs*:

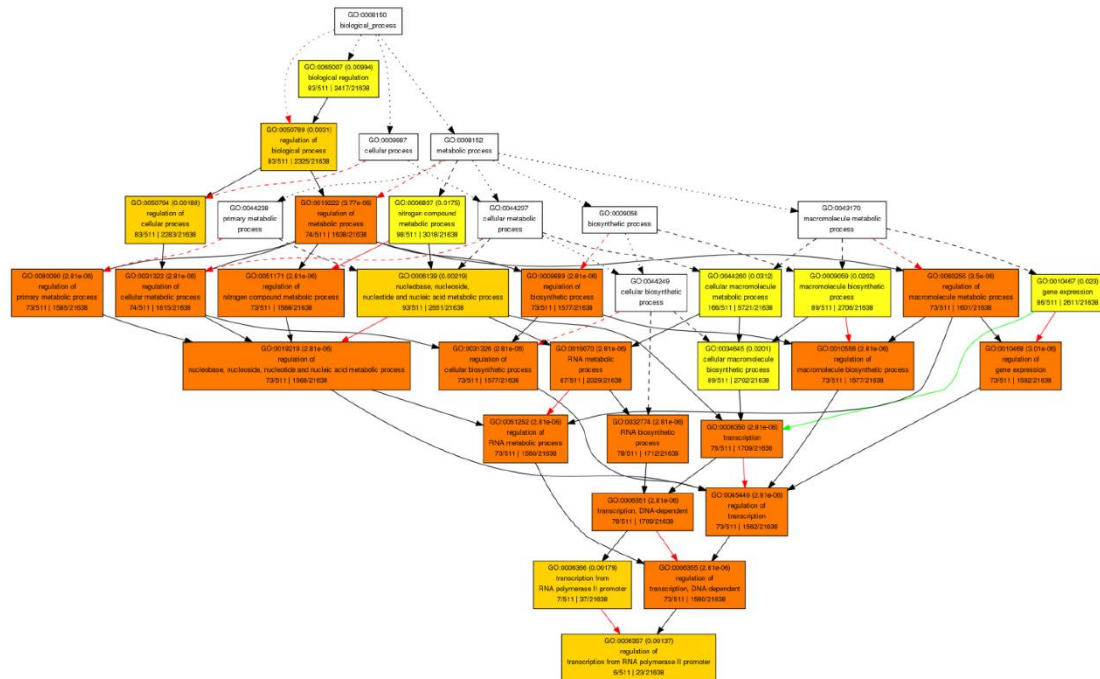

Significance levels and Arrow types Diagram

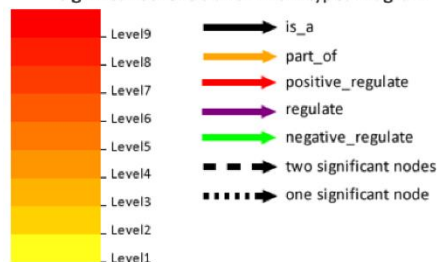

**Figure S9 continue**

**Enriched MF terms of all genes co-expressed with eight *PtNHXs*:**

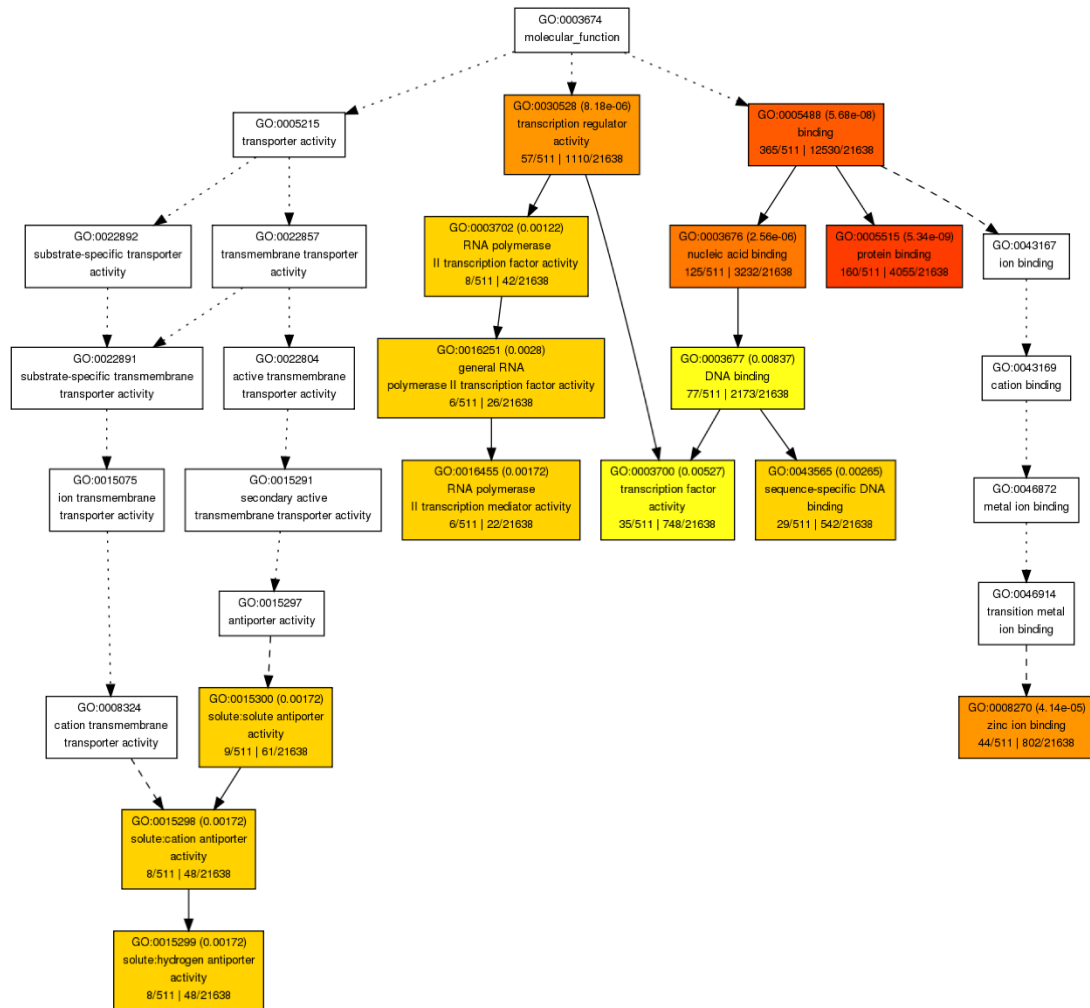

**Figure S9 continue**

Enriched CC terms of all genes co-expressed with eight *PtNHXs*:

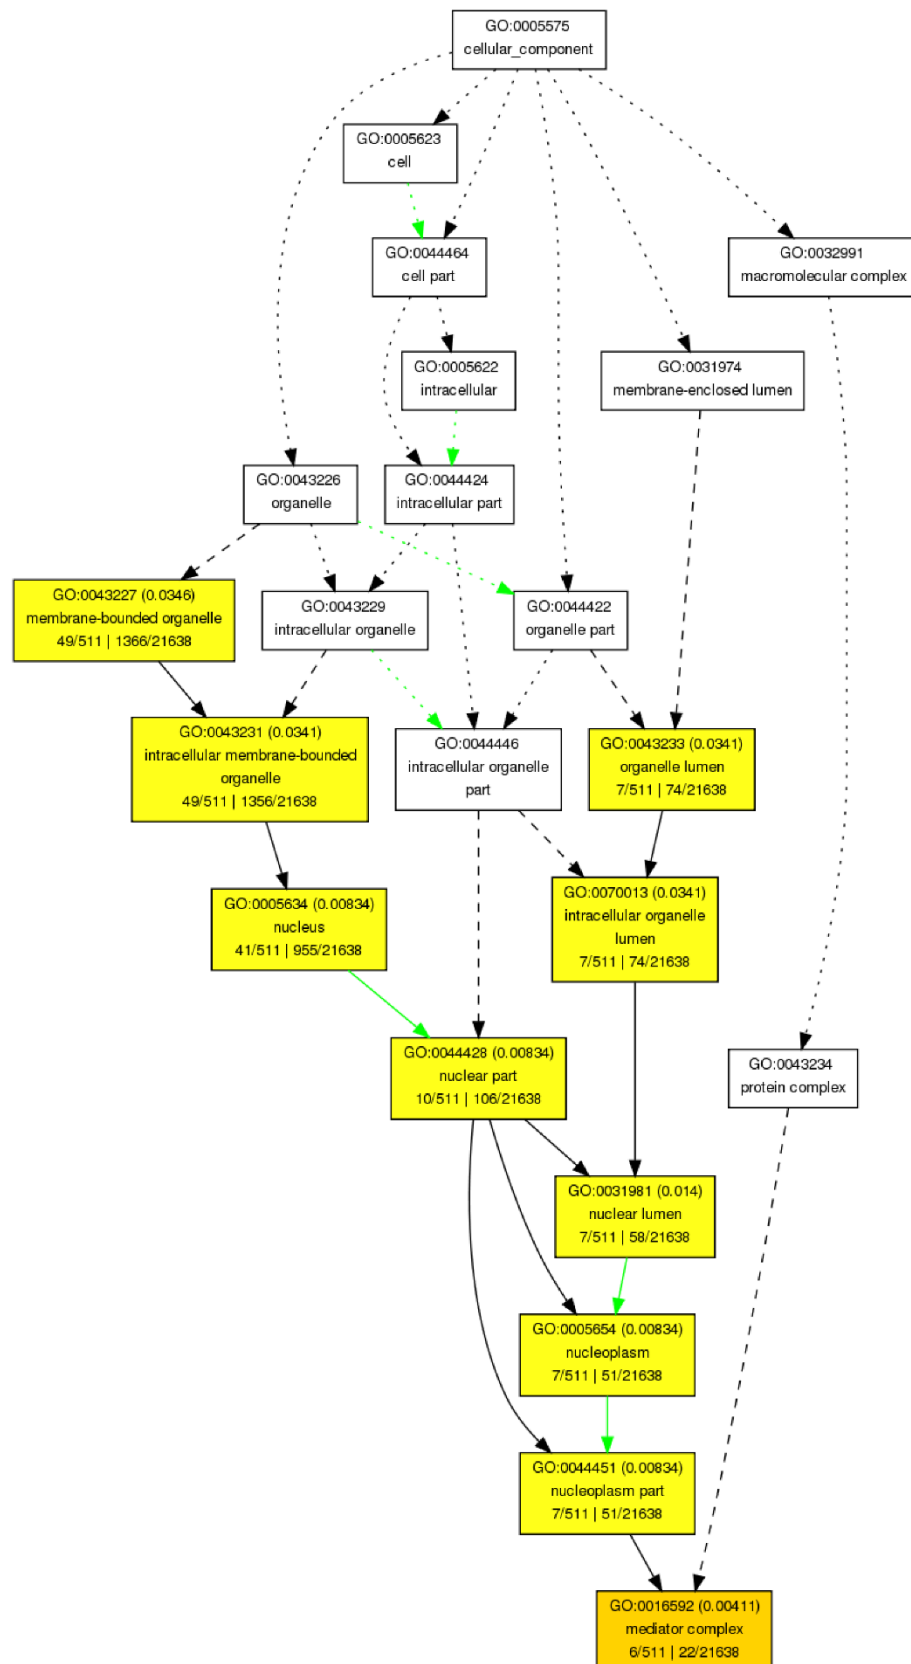

**Figure S9 continue**

**Enriched GO terms of genes co-expressed with *PtNHX3*:**

| GO_acc     | Type | Term                                                                                | Gene | FDR     | GO enrichment |
|------------|------|-------------------------------------------------------------------------------------|------|---------|---------------|
| GO:0080090 | BP   | regulation of primary metabolic process                                             | 13   | 7.2E-04 | 3.62          |
| GO:0045449 | BP   | regulation of transcription                                                         | 13   | 7.2E-04 | 3.68          |
| GO:0019219 | BP   | regulation of nucleobase, nucleoside, nucleotide and nucleic acid metabolic process | 13   | 7.2E-04 | 3.66          |
| GO:0031326 | BP   | regulation of cellular biosynthetic process                                         | 13   | 7.2E-04 | 3.64          |
| GO:0010468 | BP   | regulation of gene expression                                                       | 13   | 7.2E-04 | 3.61          |
| GO:0060255 | BP   | regulation of macromolecule metabolic process                                       | 13   | 7.2E-04 | 3.59          |
| GO:0009889 | BP   | regulation of biosynthetic process                                                  | 13   | 7.2E-04 | 3.64          |
| GO:0051171 | BP   | regulation of nitrogen compound metabolic process                                   | 13   | 7.2E-04 | 3.66          |
| GO:0051252 | BP   | regulation of RNA metabolic process                                                 | 13   | 7.2E-04 | 3.68          |
| GO:0006355 | BP   | regulation of transcription, DNA-dependent                                          | 13   | 7.2E-04 | 3.68          |
| GO:0010556 | BP   | regulation of macromolecule biosynthetic process                                    | 13   | 7.2E-04 | 3.64          |
| GO:0031323 | BP   | regulation of cellular metabolic process                                            | 13   | 7.3E-04 | 3.55          |
| GO:0019222 | BP   | regulation of metabolic process                                                     | 13   | 7.7E-04 | 3.50          |
| GO:0032774 | BP   | RNA biosynthetic process                                                            | 13   | 9.9E-04 | 3.35          |
| GO:0006350 | BP   | transcription                                                                       | 13   | 9.9E-04 | 3.36          |
| GO:0006351 | BP   | transcription, DNA-dependent                                                        | 13   | 9.9E-04 | 3.36          |
| GO:0016070 | BP   | RNA metabolic process                                                               | 14   | 1.3E-03 | 3.05          |
| GO:0050794 | BP   | regulation of cellular process                                                      | 13   | 1.4E-02 | 2.51          |
| GO:0010467 | BP   | gene expression                                                                     | 14   | 1.5E-02 | 2.37          |
| GO:0050789 | BP   | regulation of biological process                                                    | 13   | 1.5E-02 | 2.47          |
| GO:0006139 | BP   | nucleobase, nucleoside, nucleotide and nucleic acid metabolic process               | 14   | 1.6E-02 | 2.33          |
| GO:0006807 | BP   | nitrogen compound metabolic process                                                 | 15   | 1.8E-02 | 2.19          |
| GO:0065007 | BP   | biological regulation                                                               | 13   | 1.9E-02 | 2.38          |
| GO:0034645 | BP   | cellular macromolecule biosynthetic process                                         | 13   | 4.4E-02 | 2.12          |
| GO:0009059 | BP   | macromolecule biosynthetic process                                                  | 13   | 4.4E-02 | 2.12          |
| GO:0008152 | BP   | metabolic process                                                                   | 35   | 4.4E-02 | 1.36          |
| GO:0043170 | BP   | macromolecule metabolic process                                                     | 23   | 4.9E-02 | 1.60          |
| GO:0030528 | MF   | transcription regulator activity                                                    | 11   | 1.3E-03 | 4.38          |
| GO:0003700 | MF   | transcription factor activity                                                       | 9    | 1.3E-03 | 5.31          |
| GO:0043565 | MF   | sequence-specific DNA binding                                                       | 8    | 1.3E-03 | 6.52          |
| GO:0003677 | MF   | DNA binding                                                                         | 15   | 1.4E-03 | 3.05          |

**Enriched BP terms of genes co-expressed with *PtNHX3*:**

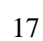

**Figure S9 continue**

**Enriched MF terms of genes co-expressed with *PtNHX3*:**

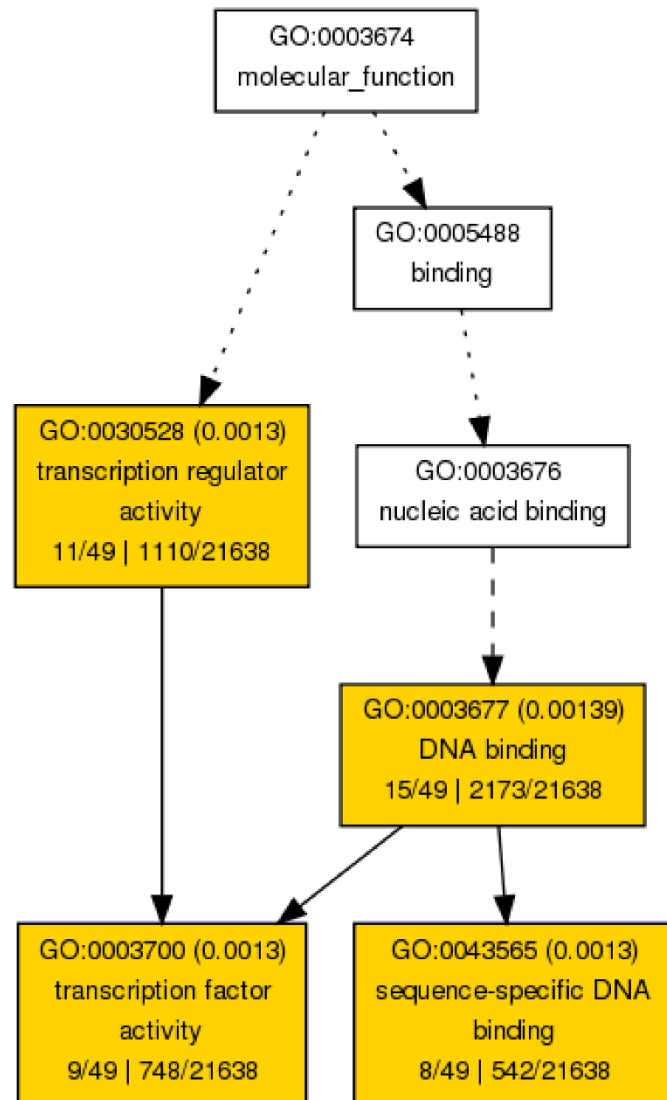

Figure S9 continue

Enriched GO terms of genes co-expressed with *PtNHX6*:

| GO_acc     | Type | Term                 | Gene | FDR     | GO enrichment                                                                            |
|------------|------|----------------------|------|---------|------------------------------------------------------------------------------------------|
| GO:0005515 | MF   | protein binding      | 51   | 2.1E-06 | 2.16 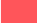 |
| GO:0005488 | MF   | binding              | 98   | 1.7E-04 | 1.34 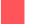 |
| GO:0008270 | MF   | zinc ion binding     | 16   | 9.6E-04 | 3.43 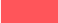 |
| GO:0003676 | MF   | nucleic acid binding | 33   | 2.7E-02 | 1.75 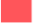 |

Enriched MF terms of genes co-expressed with *PtNHX6*:

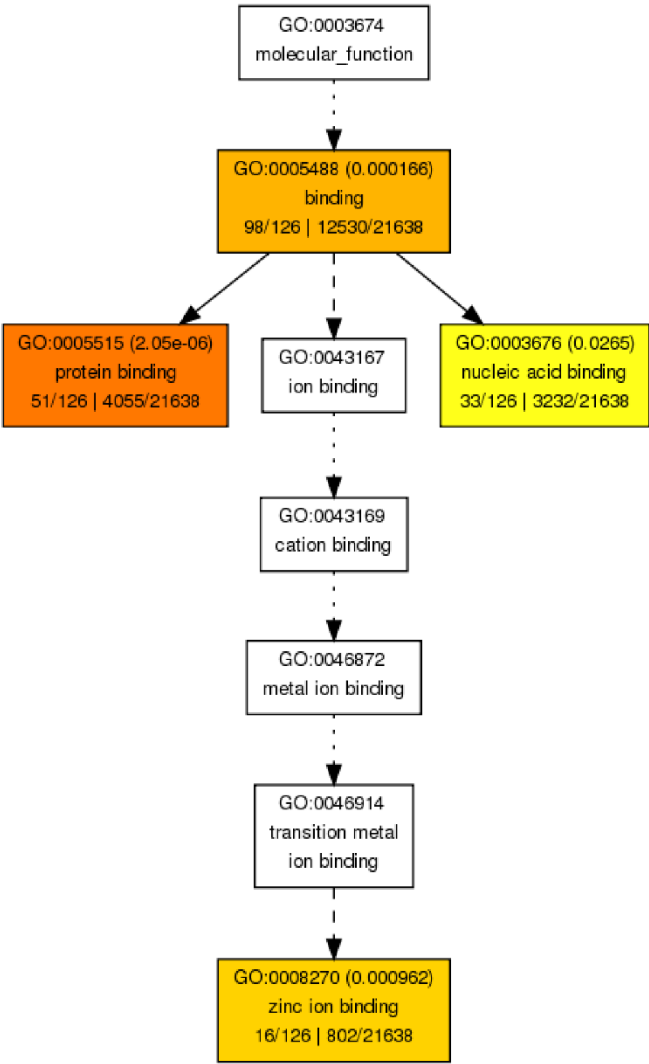

**Figure S9 continue**

**Enriched GO terms of genes co-expressed with *PtNHX8*:**

| GO_acc     | Type | Term                                                                                | Gene | FDR     | GO enrichment |
|------------|------|-------------------------------------------------------------------------------------|------|---------|---------------|
| GO:0032774 | BP   | RNA biosynthetic process                                                            | 44   | 3.0E-04 | 2.06          |
| GO:0031326 | BP   | regulation of cellular biosynthetic process                                         | 41   | 3.0E-04 | 2.08          |
| GO:0045449 | BP   | regulation of transcription                                                         | 41   | 3.0E-04 | 2.10          |
| GO:0019219 | BP   | regulation of nucleobase, nucleoside, nucleotide and nucleic acid metabolic process | 41   | 3.0E-04 | 2.10          |
| GO:0009889 | BP   | regulation of biosynthetic process                                                  | 41   | 3.0E-04 | 2.08          |
| GO:0051171 | BP   | regulation of nitrogen compound metabolic process                                   | 41   | 3.0E-04 | 2.10          |
| GO:0051252 | BP   | regulation of RNA metabolic process                                                 | 41   | 3.0E-04 | 2.11          |
| GO:0006355 | BP   | regulation of transcription, DNA-dependent                                          | 41   | 3.0E-04 | 2.11          |
| GO:0010556 | BP   | regulation of macromolecule biosynthetic process                                    | 41   | 3.0E-04 | 2.08          |
| GO:0006350 | BP   | transcription                                                                       | 44   | 3.0E-04 | 2.06          |
| GO:0006351 | BP   | transcription, DNA-dependent                                                        | 44   | 3.0E-04 | 2.06          |
| GO:0080090 | BP   | regulation of primary metabolic process                                             | 41   | 3.1E-04 | 2.07          |
| GO:0010468 | BP   | regulation of gene expression                                                       | 41   | 3.2E-04 | 2.06          |
| GO:0060255 | BP   | regulation of macromolecule metabolic process                                       | 41   | 3.4E-04 | 2.05          |
| GO:0031323 | BP   | regulation of cellular metabolic process                                            | 41   | 3.7E-04 | 2.03          |
| GO:0016070 | BP   | RNA metabolic process                                                               | 48   | 3.7E-04 | 1.90          |
| GO:0019222 | BP   | regulation of metabolic process                                                     | 41   | 4.7E-04 | 2.01          |
| GO:0006366 | BP   | transcription from RNA polymerase II promoter                                       | 5    | 3.5E-03 | 10.83         |
| GO:0006139 | BP   | nucleobase, nucleoside, nucleotide and nucleic acid metabolic process               | 53   | 8.3E-03 | 1.60          |
| GO:0034645 | BP   | cellular macromolecule biosynthetic process                                         | 52   | 2.1E-02 | 1.54          |
| GO:0009059 | BP   | macromolecule biosynthetic process                                                  | 52   | 2.1E-02 | 1.54          |
| GO:0050794 | BP   | regulation of cellular process                                                      | 45   | 2.8E-02 | 1.58          |
| GO:0050789 | BP   | regulation of biological process                                                    | 45   | 3.8E-02 | 1.55          |
| GO:0006807 | BP   | nitrogen compound metabolic process                                                 | 55   | 4.2E-02 | 1.46          |
| GO:0003676 | MF   | nucleic acid binding                                                                | 74   | 3.2E-05 | 1.83          |
| GO:0005488 | MF   | binding                                                                             | 194  | 1.5E-04 | 1.24          |
| GO:0005515 | MF   | protein binding                                                                     | 83   | 1.5E-04 | 1.64          |
| GO:0030528 | MF   | transcription regulator activity                                                    | 33   | 3.4E-04 | 2.38          |
| GO:0008270 | MF   | zinc ion binding                                                                    | 24   | 5.2E-03 | 2.40          |
| GO:0003677 | MF   | DNA binding                                                                         | 47   | 7.2E-03 | 1.73          |
| GO:0003702 | MF   | RNA polymerase II transcription factor activity                                     | 5    | 1.1E-02 | 9.54          |
| GO:0005654 | CC   | nucleoplasm                                                                         | 5    | 2.0E-02 | 7.86          |
| GO:0005634 | CC   | nucleus                                                                             | 25   | 2.0E-02 | 2.10          |
| GO:0044451 | CC   | nucleoplasm part                                                                    | 5    | 2.0E-02 | 7.86          |
| GO:0031981 | CC   | nuclear lumen                                                                       | 5    | 2.6E-02 | 6.91          |
| GO:0043233 | CC   | organelle lumen                                                                     | 5    | 4.0E-02 | 5.41          |
| GO:0044428 | CC   | nuclear part                                                                        | 6    | 4.0E-02 | 4.54          |
| GO:0070013 | CC   | intracellular organelle lumen                                                       | 5    | 4.0E-02 | 5.41          |

**Enriched BP terms of genes co-expressed with *PtNHX8*:**

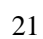

**Figure S9 continue**

**Enriched MF terms of genes co-expressed with *PtNHX8*:**

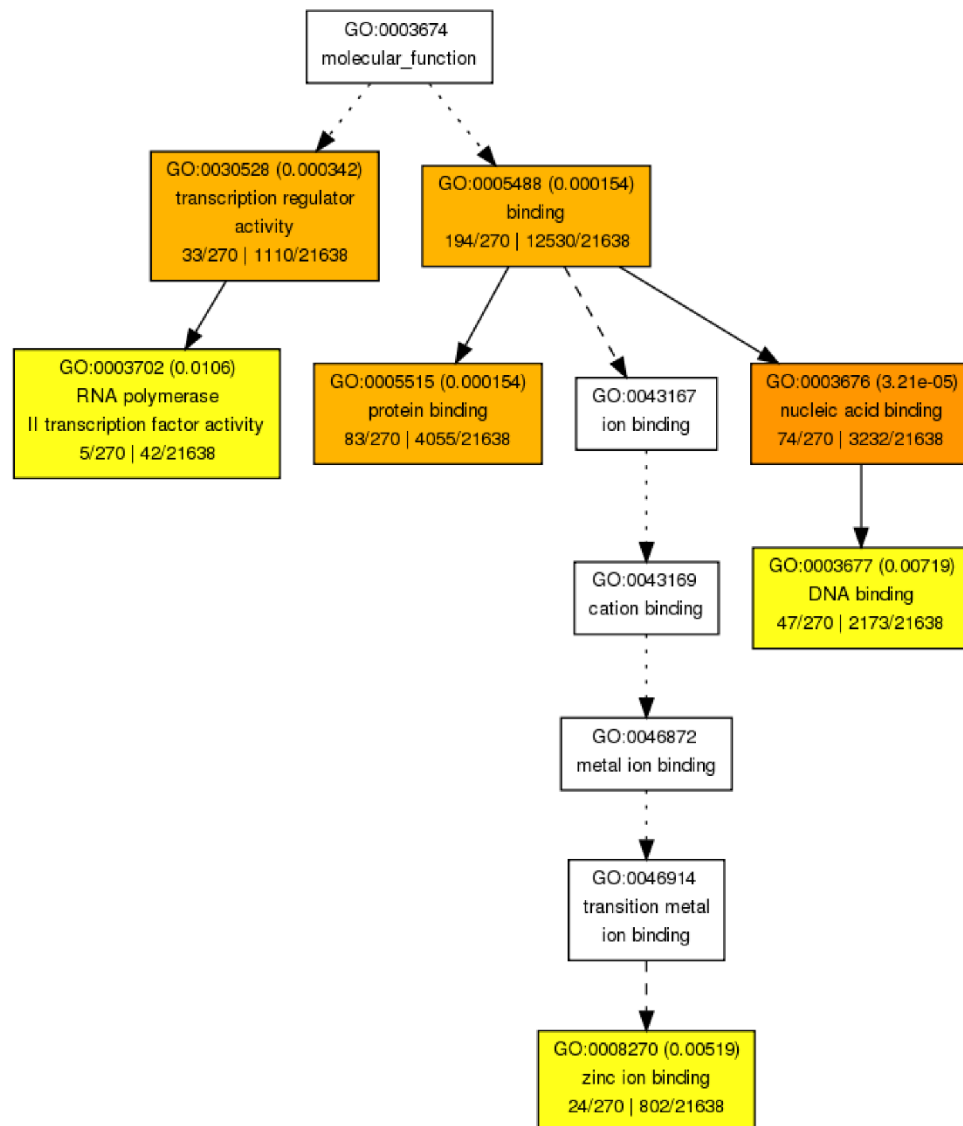

**Figure S9 continue**

Enriched CC terms of genes co-expressed with *PtNHX8*:

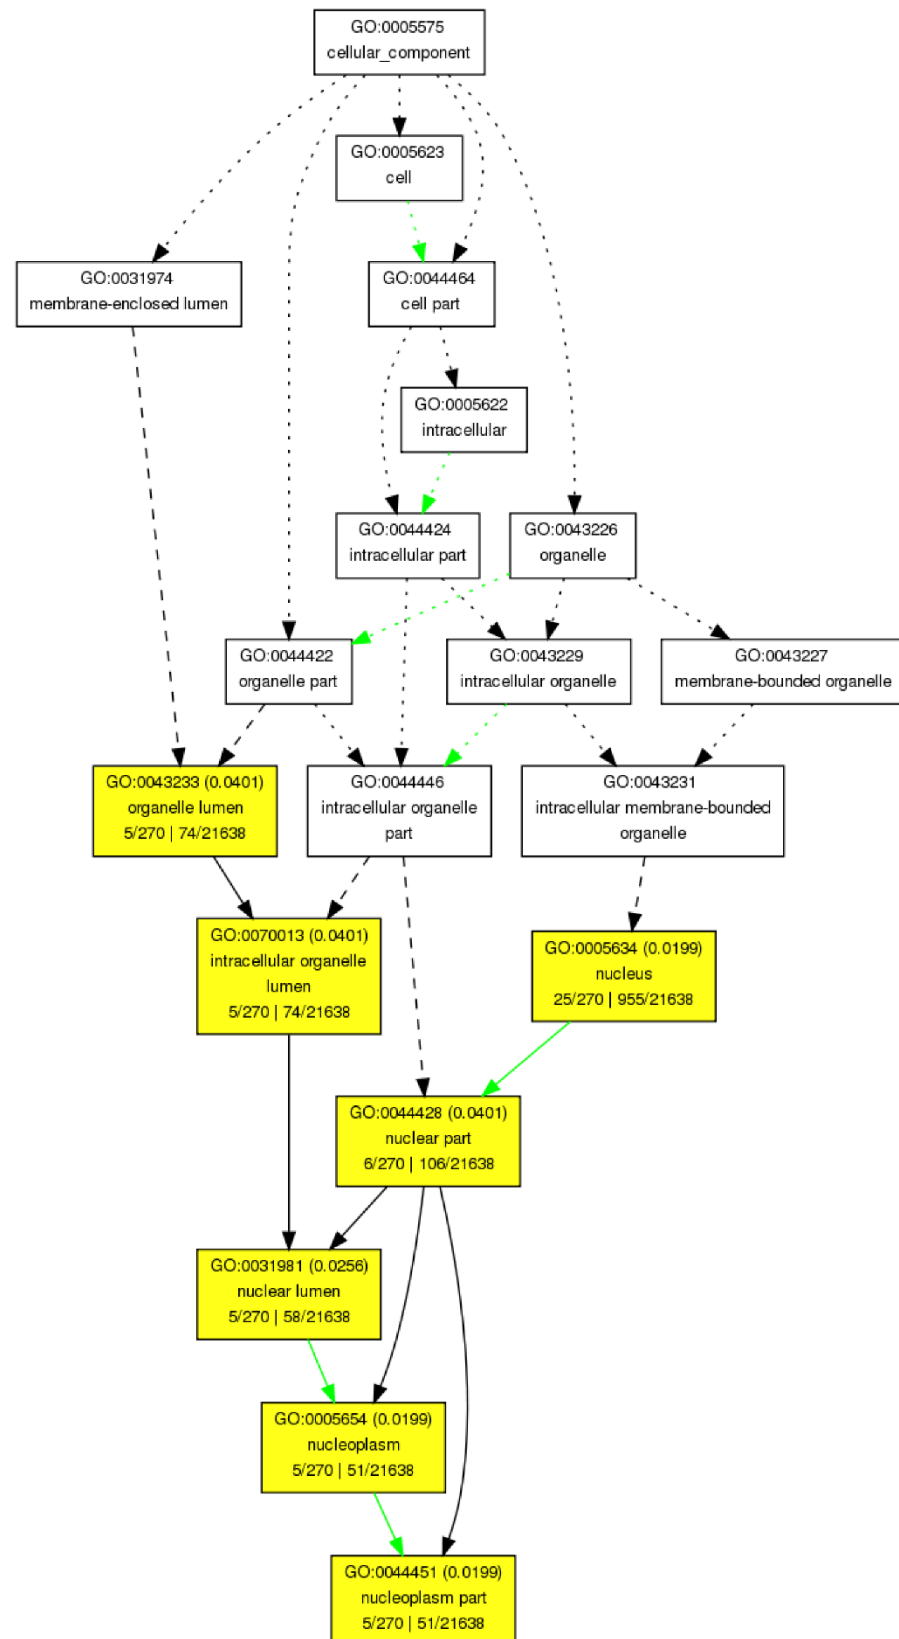

**Figure S10. Co-expression network of *Arabidopsis* NHX genes.**

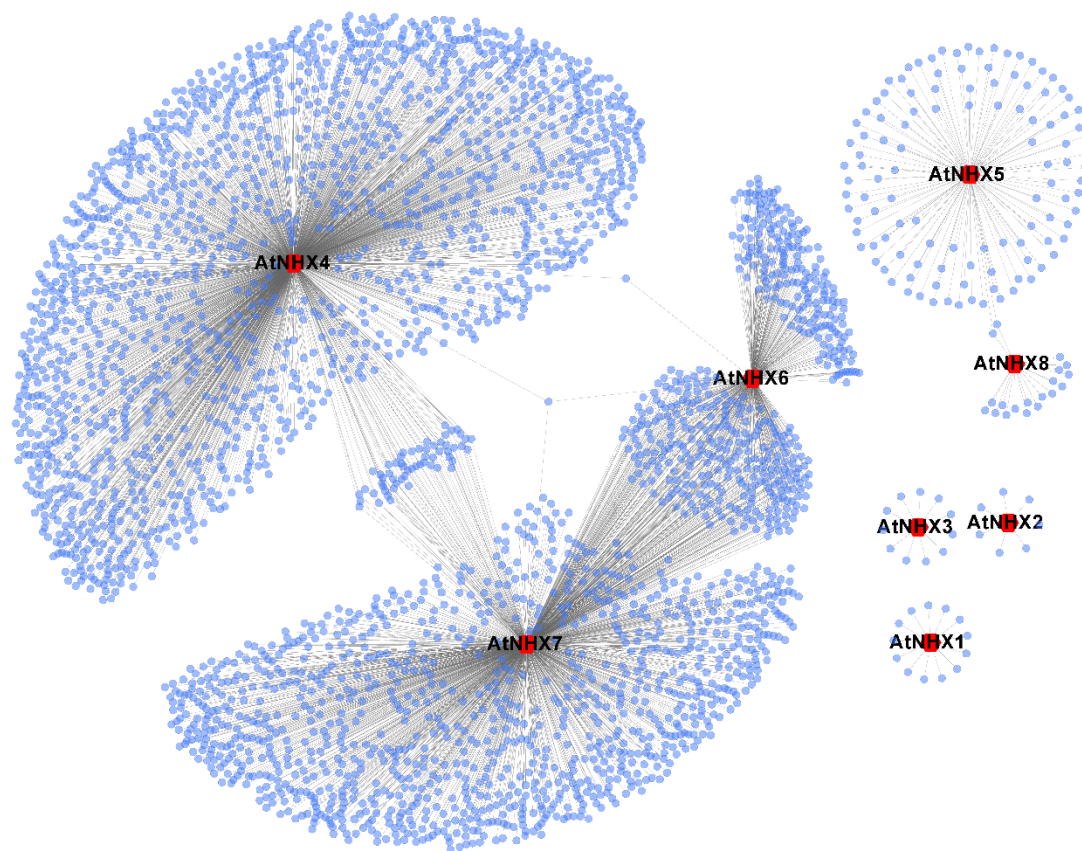

**Figure S11. GO enrichment analysis of PtNHX PPI network.**

**Enriched GO terms of genes in the PtNHX PPI network:**

| GO_acc     | Type | Term                                                          | Gene | FDR     | GO enrichment |
|------------|------|---------------------------------------------------------------|------|---------|---------------|
| GO:0055085 | BP   | transmembrane transport                                       | 28   | 1.6E-18 | 10.05         |
| GO:0006810 | BP   | transport                                                     | 35   | 1.6E-17 | 5.99          |
| GO:0051234 | BP   | establishment of localization                                 | 35   | 1.6E-17 | 5.99          |
| GO:0051179 | BP   | localization                                                  | 35   | 1.8E-17 | 5.92          |
| GO:0006812 | BP   | cation transport                                              | 21   | 2.7E-17 | 15.10         |
| GO:0006811 | BP   | ion transport                                                 | 22   | 3.1E-17 | 13.41         |
| GO:0043038 | BP   | amino acid activation                                         | 12   | 3.0E-15 | 48.08         |
| GO:0043039 | BP   | tRNA aminoacylation                                           | 12   | 3.0E-15 | 48.08         |
| GO:0006418 | BP   | tRNA aminoacylation for protein translation                   | 12   | 3.0E-15 | 48.73         |
| GO:0006399 | BP   | tRNA metabolic process                                        | 12   | 5.2E-12 | 24.20         |
| GO:0034660 | BP   | ncRNA metabolic process                                       | 12   | 5.5E-11 | 19.39         |
| GO:0006520 | BP   | cellular amino acid metabolic process                         | 12   | 1.4E-08 | 11.63         |
| GO:0044106 | BP   | cellular amine metabolic process                              | 12   | 2.2E-08 | 11.10         |
| GO:0006519 | BP   | cellular amino acid and derivative metabolic process          | 12   | 4.0E-08 | 10.45         |
| GO:0009308 | BP   | amine metabolic process                                       | 12   | 7.2E-08 | 9.83          |
| GO:0034641 | BP   | cellular nitrogen compound metabolic process                  | 12   | 8.1E-07 | 7.81          |
| GO:0009987 | BP   | cellular process                                              | 55   | 1.1E-06 | 1.69          |
| GO:0019752 | BP   | carboxylic acid metabolic process                             | 12   | 1.5E-06 | 7.23          |
| GO:0042180 | BP   | cellular ketone metabolic process                             | 12   | 1.5E-06 | 7.20          |
| GO:0006082 | BP   | organic acid metabolic process                                | 12   | 1.5E-06 | 7.21          |
| GO:0043436 | BP   | oxoacid metabolic process                                     | 12   | 1.5E-06 | 7.23          |
| GO:0006412 | BP   | translation                                                   | 12   | 2.8E-05 | 5.38          |
| GO:0016192 | BP   | vesicle-mediated transport                                    | 7    | 2.9E-05 | 11.95         |
| GO:0006886 | BP   | intracellular protein transport                               | 7    | 4.9E-05 | 10.96         |
| GO:0070727 | BP   | cellular macromolecule localization                           | 7    | 6.2E-05 | 10.41         |
| GO:0034613 | BP   | cellular protein localization                                 | 7    | 6.2E-05 | 10.41         |
| GO:0046907 | BP   | intracellular transport                                       | 7    | 1.4E-04 | 9.11          |
| GO:0045184 | BP   | establishment of protein localization                         | 7    | 3.9E-04 | 7.65          |
| GO:0015031 | BP   | protein transport                                             | 7    | 3.9E-04 | 7.65          |
| GO:0051649 | BP   | establishment of localization in cell                         | 7    | 4.3E-04 | 7.49          |
| GO:0008104 | BP   | protein localization                                          | 7    | 5.8E-04 | 7.08          |
| GO:0051641 | BP   | cellular localization                                         | 7    | 5.8E-04 | 7.04          |
| GO:0033036 | BP   | macromolecule localization                                    | 7    | 6.9E-04 | 6.81          |
| GO:0044281 | BP   | small molecule metabolic process                              | 12   | 1.8E-03 | 3.34          |
| GO:0007165 | BP   | signal transduction                                           | 8    | 2.5E-03 | 4.69          |
| GO:0007264 | BP   | small GTPase mediated signal transduction                     | 5    | 3.5E-03 | 7.95          |
| GO:0007242 | BP   | intracellular signaling cascade                               | 5    | 3.9E-03 | 7.71          |
| GO:0023046 | BP   | signaling process                                             | 8    | 4.8E-03 | 4.17          |
| GO:0023060 | BP   | signal transmission                                           | 8    | 4.8E-03 | 4.17          |
| GO:0023052 | BP   | signaling                                                     | 8    | 4.4E-02 | 2.89          |
| GO:0015299 | MF   | solute:hydrogen antiporter activity                           | 20   | 6.0E-33 | 125.22        |
| GO:0015298 | MF   | solute:cation antiporter activity                             | 20   | 6.0E-33 | 125.22        |
| GO:0015300 | MF   | solute:solute antiporter activity                             | 20   | 2.2E-31 | 98.53         |
| GO:0015297 | MF   | antiporter activity                                           | 20   | 2.9E-25 | 43.87         |
| GO:0015291 | MF   | secondary active transmembrane transporter activity           | 20   | 2.6E-24 | 38.28         |
| GO:0008324 | MF   | cation transmembrane transporter activity                     | 24   | 2.6E-24 | 22.33         |
| GO:0015075 | MF   | ion transmembrane transporter activity                        | 25   | 1.8E-21 | 15.06         |
| GO:0022891 | MF   | substrate-specific transmembrane transporter activity         | 25   | 2.7E-20 | 13.34         |
| GO:0022892 | MF   | substrate-specific transporter activity                       | 25   | 4.4E-19 | 11.76         |
| GO:0022804 | MF   | active transmembrane transporter activity                     | 20   | 1.0E-17 | 16.33         |
| GO:0022857 | MF   | transmembrane transporter activity                            | 25   | 3.9E-16 | 8.68          |
| GO:0004812 | MF   | aminoacyl-tRNA ligase activity                                | 12   | 9.3E-16 | 48.08         |
| GO:0016875 | MF   | ligase activity, forming carbon-oxygen bonds                  | 12   | 9.3E-16 | 47.45         |
| GO:0016876 | MF   | ligase activity, forming aminoacyl-tRNA and related compounds | 12   | 9.3E-16 | 47.45         |
| GO:0005215 | MF   | transporter activity                                          | 25   | 1.6E-13 | 6.54          |
| GO:0016874 | MF   | ligase activity                                               | 12   | 2.8E-08 | 9.85          |
| GO:0044425 | CC   | membrane part                                                 | 34   | 8.8E-18 | 6.33          |
| GO:0044464 | CC   | cell part                                                     | 56   | 1.3E-17 | 2.87          |
| GO:0005623 | CC   | cell                                                          | 56   | 1.3E-17 | 2.87          |
| GO:0016021 | CC   | integral to membrane                                          | 26   | 1.7E-14 | 6.97          |
| GO:0016020 | CC   | membrane                                                      | 39   | 1.7E-14 | 3.89          |
| GO:0031224 | CC   | intrinsic to membrane                                         | 27   | 8.7E-14 | 6.07          |
| GO:0005737 | CC   | cytoplasm                                                     | 22   | 4.6E-09 | 4.75          |
| GO:0030117 | CC   | membrane coat                                                 | 7    | 1.1E-08 | 37.57         |
| GO:0048475 | CC   | coated membrane                                               | 7    | 1.1E-08 | 37.57         |
| GO:0044424 | CC   | intracellular part                                            | 22   | 3.0E-04 | 2.44          |
| GO:0005622 | CC   | intracellular                                                 | 25   | 3.1E-04 | 2.23          |

Figure S11 continue

Enriched BP terms of genes in the PtNHX PPI network:

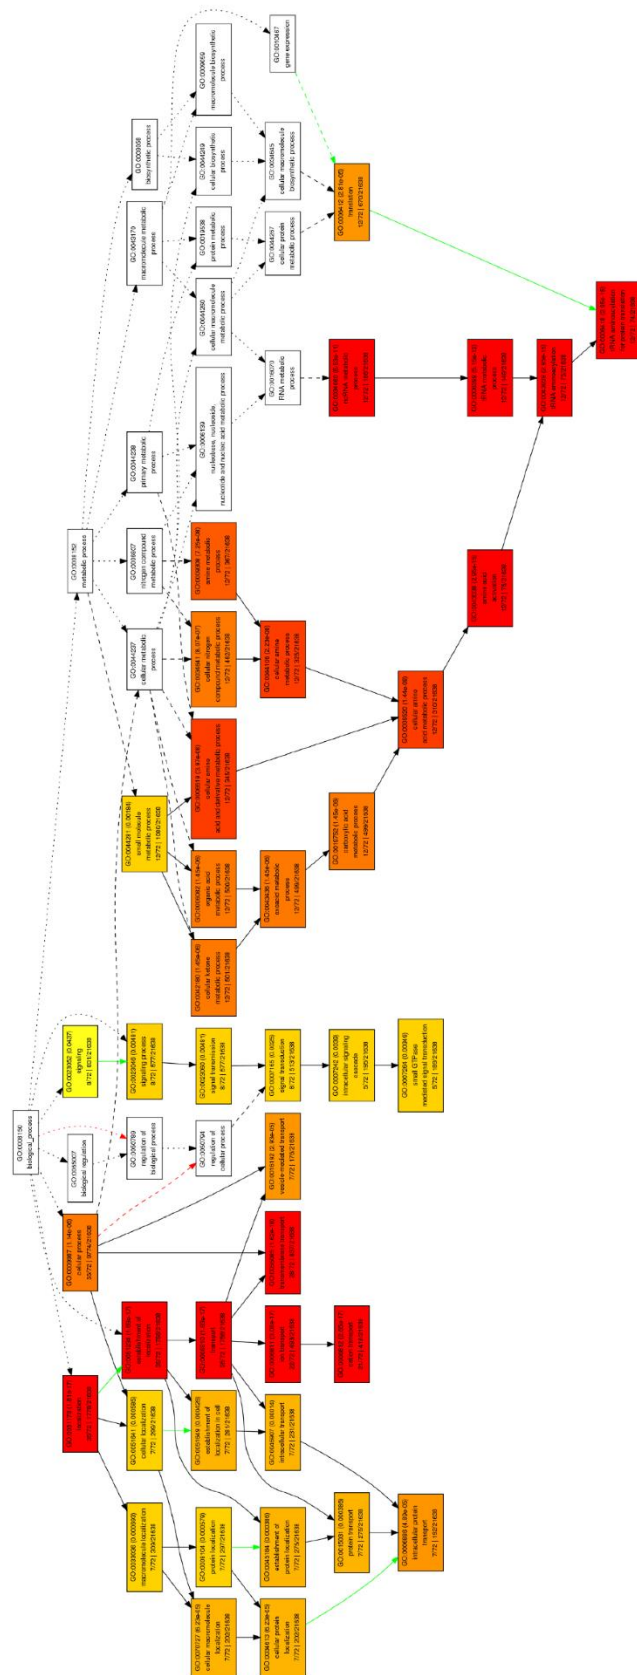

**Figure S11 continue**

**Enriched MF terms of genes in the PtNHX PPI network:**

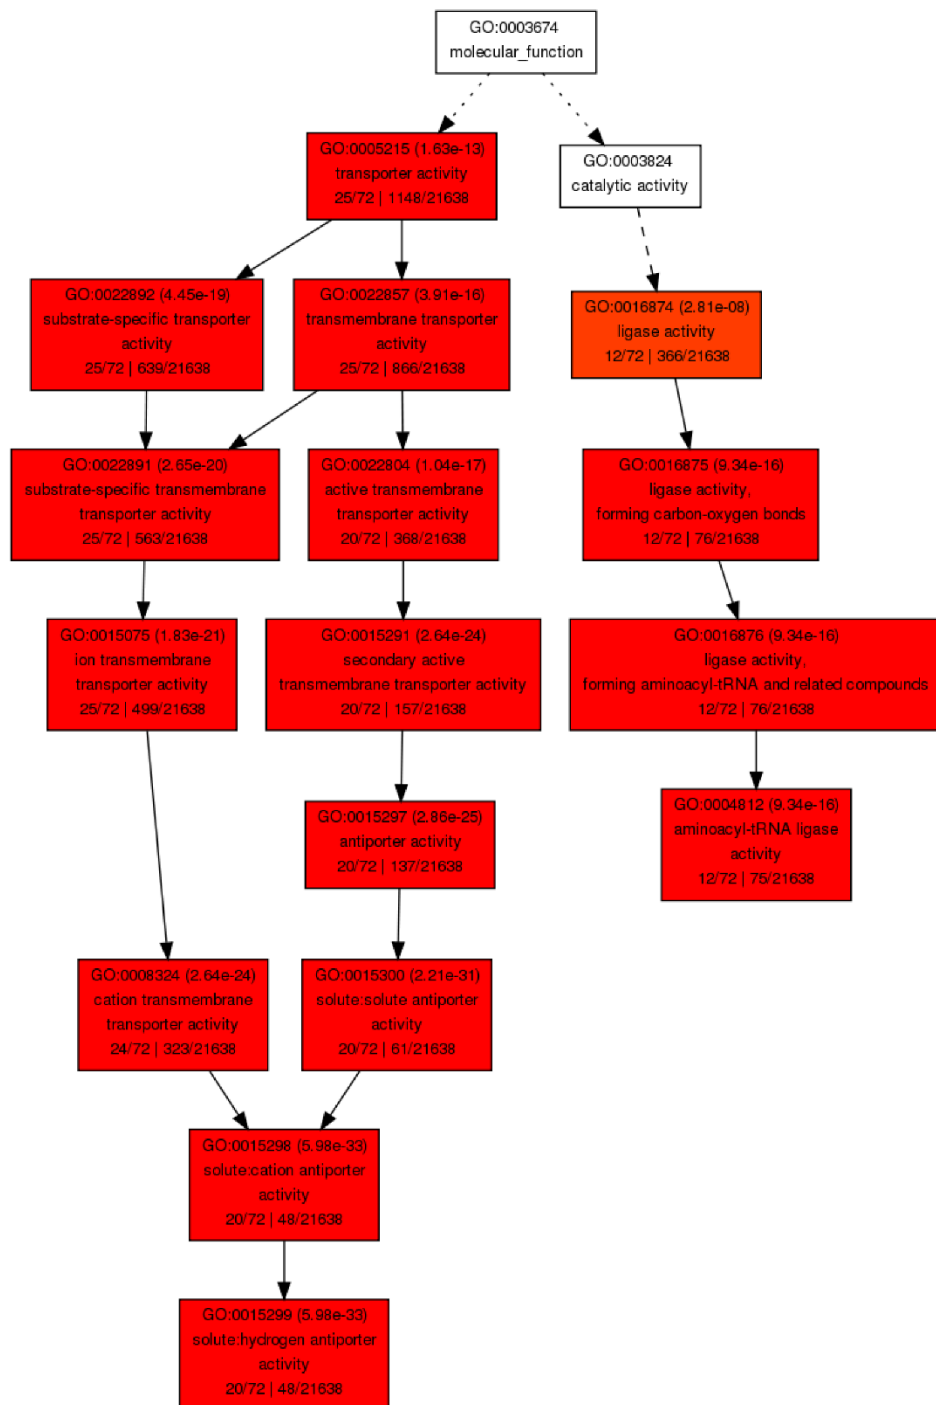

**Figure S11 continue**

Enriched CC terms of genes in the PtNHX PPI network:

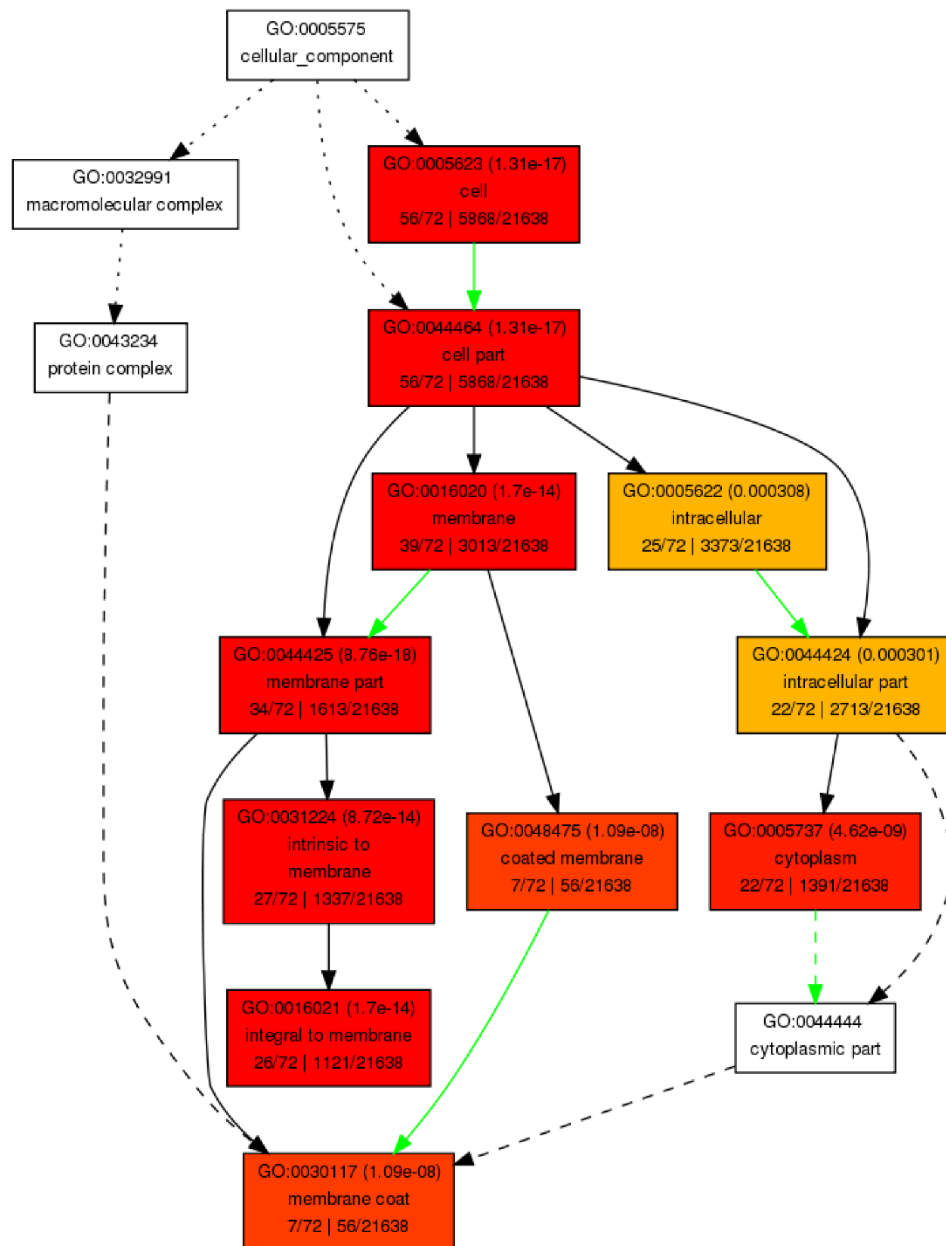

**Figure S12. Details of SNPs located in *PtNHXs*.**

| Position             | Classification           | Alternate | Reference | Substitution | Genotype (549) |     |     |     | Located motif |
|----------------------|--------------------------|-----------|-----------|--------------|----------------|-----|-----|-----|---------------|
|                      |                          |           |           |              | /.             | 0/0 | 0/1 | 1/1 |               |
| <b><i>PtNHX1</i></b> | <b>Potri.005G045100</b>  |           |           |              |                |     |     |     |               |
| 3308285              | non synonymous coding    | C         | G         | H544D        |                | 518 | 31  |     | —             |
| 3308495              | stop gained              | A         | C         | G474*        |                | 548 | 1   |     | —             |
| 3308545              | non synonymous coding    | A         | G         | T457I        |                | 548 | 1   |     | —             |
| 3308549              | non synonymous coding    | C         | T         | M456V        |                | 548 | 1   |     | —             |
| 3308600              | non synonymous coding    | C         | G         | Q439E        | 1              | 546 | 2   |     | —             |
| 3308618              | non synonymous coding    | A         | C         | V433L        |                | 547 | 2   |     | TM10          |
| 3309434              | non synonymous coding    | C         | G         | L352V        |                | 542 | 5   | 2   | TM8           |
| 3309440              | non synonymous coding    | A         | C         | G350C        |                | 541 | 8   |     | TM8           |
| 3309443              | non synonymous coding    | C         | G         | L349V        |                | 548 | 1   |     | TM8           |
| 3310054              | non synonymous coding    | G         | T         | M267L        |                | 548 | 1   |     | —             |
| 3310079              | non synonymous coding    | C         | T         | I258M        |                | 547 | 2   |     | —             |
| 3310845              | non synonymous coding    | A         | G         | R216C        |                | 548 | 1   |     | —             |
| 3310847              | non synonymous coding    | G         | A         | V215A        |                | 548 | 1   |     | —             |
| 3310989              | non synonymous coding    | T         | G         | L168I        |                | 548 | 1   |     | —             |
| 3311082              | intron splice site donor | CCAC      | CCACAC    |              |                | 546 | 3   |     | —             |
| 3312428              | non synonymous coding    | C         | T         | E44G         |                | 548 | 1   |     | —             |
| 3312456              | non synonymous coding    | A         | C         | A35S         |                | 548 | 1   |     | TM1           |
| 3312534              | non synonymous coding    | A         | C         | G9C          |                | 548 | 1   |     | —             |
| 3312593              | start gained             | G         | A         |              |                | 548 | 1   |     | —             |
| 3313355              | start gained             | A         | G         |              | 1              | 30  | 170 | 348 | —             |
| 3313358              | start gained             | C         | A         |              |                | 520 | 27  | 2   | —             |
| 3313394              | start gained             | T         | G         |              |                | 433 | 106 | 10  | —             |
| <b><i>PtNHX2</i></b> | <b>Potri.013G031700</b>  |           |           |              |                |     |     |     |               |
| 2099568              | non synonymous coding    | A         | T         | Y529F        | 1              | 546 | 2   |     | —             |
| 2099610              | non synonymous coding    | C         | G         | A515G        |                | 545 | 4   |     | —             |
| 2099611              | non synonymous coding    | T         | C         | A515T        | 1              | 532 | 16  |     | —             |
| 2099614              | non synonymous coding    | C         | T         | N514D        | 1              | 546 | 2   |     | —             |
| 2099697              | non synonymous coding    | C         | T         | H486R        |                | 547 | 2   |     | —             |
| 2099770              | non synonymous coding    | G         | C         | A462P        |                | 547 | 2   |     | —             |
| 2100368              | non synonymous coding    | C         | T         | N412S        |                | 548 | 1   |     | —             |
| 2101155              | non synonymous coding    | T         | C         | V300I        |                | 548 | 1   |     | —             |
| 2101374              | non synonymous coding    | A         | G         | L263F        |                | 548 | 1   |     | —             |
| 2102198              | non synonymous coding    | A         | C         | G233V        |                | 548 | 1   |     | TM5           |
| 2102363              | non synonymous coding    | A         | C         | E213D        |                | 547 | 2   |     | —             |
| 2102377              | non synonymous coding    | T         | C         | V209I        |                | 543 | 6   |     | —             |
| 2102406              | non synonymous coding    | C         | T         | Q199R        |                | 548 | 1   |     | —             |
| 2102497              | non synonymous coding    | T         | C         | G169S        |                | 547 | 2   |     | —             |
| 2103426              | non synonymous coding    | A         | T         | Q105H        |                | 548 | 1   |     | —             |
| 2104173              | non synonymous coding    | A         | G         | T57I         |                | 547 | 2   |     | TM2           |
| 2104305              | non synonymous coding    | C         | T         | Q13R         |                | 543 | 6   |     | —             |
| 2105061              | start gained             | C         | A         |              |                | 548 | 1   |     | —             |
| 2105153              | start gained             | C         | G         |              |                | 546 | 3   |     | —             |
| <b><i>PtNHX3</i></b> | <b>Potri.013G026600</b>  |           |           |              |                |     |     |     |               |
| 1756634              | start lost               | G         | A         | M1V          |                | 548 | 1   |     | —             |

Figure S12 continue

|                                |                       |   |   |       |     |     |     |     |
|--------------------------------|-----------------------|---|---|-------|-----|-----|-----|-----|
| 1756643                        | non synonymous coding | C | G | E4Q   | 219 | 241 | 89  | —   |
| 1756644                        | non synonymous coding | T | A | E4V   | 76  | 227 | 246 | —   |
| 1756670                        | non synonymous coding | C | A | N13H  | 548 | 1   |     | —   |
| 1756683                        | non synonymous coding | G | T | F17C  | 247 | 226 | 76  | —   |
| 1756704                        | non synonymous coding | T | C | S24L  | 548 | 1   |     | —   |
| 1756749                        | non synonymous coding | T | A | H39L  | 548 | 1   |     | —   |
| 1756755                        | non synonymous coding | G | A | H41R  | 547 | 2   |     | —   |
| 1756783                        | non synonymous coding | G | C | F50L  | 105 | 255 | 189 | —   |
| 1756824                        | non synonymous coding | T | C | A64V  | 529 | 20  |     | TM1 |
| 1756868                        | non synonymous coding | A | C | H79N  | 547 | 2   |     | —   |
| 1756901                        | non synonymous coding | A | C | L90I  | 546 | 3   |     | TM2 |
| 1757044                        | non synonymous coding | A | G | V102I | 1   | 547 | 1   | TM2 |
| 1757057                        | non synonymous coding | A | C | A106E | 548 | 1   |     | —   |
| 1757602                        | non synonymous coding | A | G | E175K | 547 | 2   |     | —   |
| 1757871                        | non synonymous coding | G | A | E205G | 547 | 2   |     | —   |
| 1757891                        | non synonymous coding | G | A | I212V | 548 | 1   |     | —   |
| 1757907                        | non synonymous coding | C | G | G217A | 548 | 1   |     | —   |
| 1757967                        | non synonymous coding | G | A | H237R | 548 | 1   |     | —   |
| 1757985                        | non synonymous coding | T | C | T243I | 468 | 79  | 2   | —   |
| 1758025                        | non synonymous coding | C | A | L256F | 190 | 254 | 105 | TM5 |
| 1759213                        | non synonymous coding | G | C | H325Q | 548 | 1   |     | —   |
| 1759451                        | non synonymous coding | G | A | R365G | 548 | 1   |     | —   |
| 1759452                        | non synonymous coding | C | G | R365T | 547 | 2   |     | —   |
| 1759791                        | non synonymous coding | G | A | N398S | 548 | 1   |     | —   |
| 1759816                        | non synonymous coding | A | C | S406R | 547 | 2   |     | —   |
| 1760383                        | non synonymous coding | G | C | T490S | 1   | 547 | 1   | —   |
| 1760405                        | non synonymous coding | G | C | D497E | 2   | 546 | 1   | —   |
| 1760409                        | non synonymous coding | G | A | R499G | 1   | 547 | 1   | —   |
| 1760421                        | non synonymous coding | T | C | L503F | 2   | 544 | 3   | —   |
| 1760495                        | non synonymous coding | G | A | I527M |     | 546 | 3   | —   |
| 1760498                        | non synonymous coding | T | A | R528S | 1   | 543 | 5   | —   |
| 1760587                        | non synonymous coding | A | T | F558Y |     | 548 | 1   | —   |
| <hr/>                          |                       |   |   |       |     |     |     |     |
| <b>PtNHX4 Potri.010G031500</b> |                       |   |   |       |     |     |     |     |
| 4632425                        | non synonymous coding | A | G | A53T  | 519 | 30  |     | TM2 |
| 4632589                        | non synonymous coding | T | A | L80F  | 548 | 1   |     | TM3 |
| 4632962                        | non synonymous coding | G | T | H110M | 450 | 94  | 5   | TM4 |
| 4633157                        | non synonymous coding | A | G | R141K | 548 | 1   |     | —   |
| 4633440                        | non synonymous coding | T | G | E168D | 548 | 1   |     | —   |
| 4633553                        | non synonymous coding | A | T | I206N | 548 | 1   |     | —   |
| 4634108                        | non synonymous coding | A | C | S245Y | 1   | 547 | 1   | —   |
| 4634859                        | non synonymous coding | G | A | K368R | 435 | 108 | 6   | —   |
| 4634867                        | non synonymous coding | A | T | Y371N |     | 548 | 1   | —   |
| 4636205                        | non synonymous coding | T | G | R511L | 2   | 546 | 1   | —   |
| <hr/>                          |                       |   |   |       |     |     |     |     |
| <b>PtNHX5 Potri.014G134900</b> |                       |   |   |       |     |     |     |     |
| 10266176                       | start gained          | T | A |       | 2   | 531 | 15  | 1   |
| 10266206                       | start gained          | G | T |       | 2   | 546 | 1   | —   |
| 10266279                       | start gained          | T | C |       |     | 548 | 1   | —   |
| 10266468                       | splice site acceptor  | C | A |       |     | 548 | 1   | —   |
| 10266500                       | start lost            | T | G | M1I   | 1   | 546 | 2   | —   |

Figure S12 continue

|                                |                                 |      |         |       |       |     |    |     |
|--------------------------------|---------------------------------|------|---------|-------|-------|-----|----|-----|
| 10266507                       | non synonymous coding           | T    | G       | G4C   | 548   | 1   |    | —   |
| 10266543                       | non synonymous coding           | G    | A       | I16V  | 3 542 | 4   |    | TM1 |
| 10266558                       | non synonymous coding           | A    | T       | L21M  | 1 541 | 7   |    | TM1 |
| 10266862                       | non synonymous coding           | A    | C       | P85H  | 548   | 1   |    | TM3 |
| 10266882                       | intron:5 splice site donor:5    | C    | T       |       | 544   | 5   |    | —   |
| 10267009                       | non synonymous coding           | C    | T       | M107T | 487   | 60  | 2  | TM4 |
| 10267045                       | non synonymous coding           | C    | T       | I119T | 548   | 1   |    | TM4 |
| 10267585                       | non synonymous coding           | G    | A       | T125A | 498   | 50  | 1  | —   |
| 10267592                       | non synonymous coding           | T    | A       | Q127L | 538   | 11  |    | —   |
| 10267615                       | non synonymous coding           | C    | G       | G135R | 538   | 11  |    | —   |
| 10268159                       | non synonymous coding           | T    | C       | T183M | 2 546 | 1   |    | —   |
| 10268164                       | non synonymous coding           | G    | A       | I185V | 2 424 | 114 | 9  | —   |
| 10268281                       | non synonymous coding           | A    | G       | A224T | 1 547 | 1   |    | TM5 |
| 10268769                       | non synonymous coding           | G    | A       | I228V | 548   | 1   |    | TM5 |
| 10268770                       | non synonymous coding           | C    | T       | I228T | 548   | 1   |    | TM5 |
| 10269307                       | non synonymous coding           | C    | G       | W284S | 1 547 | 1   |    | TM6 |
| 10269319                       | non synonymous coding           | A    | C       | S288Y | 548   | 1   |    | —   |
| 10269477                       | non synonymous coding           | T    | A       | K296N | 473   | 71  | 5  | —   |
| 10269827                       | non synonymous coding           | T    | G       | G343W | 548   | 1   |    | TM8 |
| 10270031                       | non synonymous coding           | G    | A       | M385V | 548   | 1   |    | TM9 |
| 10271523                       | non synonymous coding           | A    | G       | V480M | 1 520 | 27  | 1  | —   |
| 10271544                       | non synonymous coding           | G    | A       | T487A | 1 546 | 2   |    | —   |
| 10271573                       | non synonymous coding           | C    | G       | L496F | 1 425 | 113 | 10 | —   |
| 10271656                       | non synonymous coding           | T    | A       | E524V | 490   | 58  | 1  | —   |
| 10271661                       | non synonymous coding           | G    | A       | I526V | 547   | 2   |    | —   |
| <b>PtNHX6 Potri.016G000200</b> |                                 |      |         |       |       |     |    |     |
| 14497                          | start gained                    | T    | C       |       | 548   | 1   |    | —   |
| 15600                          | non synonymous coding           | A    | G       | R157K | 548   | 1   |    | —   |
| 17756                          | non synonymous coding           | T    | A       | K217N | 546   | 3   |    | —   |
| 17790                          | non synonymous coding           | A    | G       | V229I | 548   | 1   |    | —   |
| 18802                          | non synonymous coding           | T    | A       | Y306F | 458   | 83  | 8  | —   |
| 19006                          | non synonymous coding           | T    | C       | A341V | 1 547 | 1   |    | —   |
| 19403                          | non synonymous coding           | A    | G       | R383H | 548   | 1   |    | —   |
| 21635                          | codon deletion                  | AAAT | AAATAAT | N467- | 1 547 | 1   |    | —   |
| <b>PtNHX7 Potri.008G140700</b> |                                 |      |         |       |       |     |    |     |
| 9390553                        | start gained                    | G    | A       |       | 548   | 1   |    | —   |
| 9390657                        | non synonymous coding           | G    | A       | I5M   | 544   | 5   |    | —   |
| 9390665                        | non synonymous coding           | A    | G       | G8E   | 1 547 | 1   |    | —   |
| 9390686                        | non synonymous coding           | C    | T       | I15T  | 548   | 1   |    | —   |
| 9390713                        | non synonymous coding           | T    | C       | A24V  | 1 547 | 1   |    | —   |
| 9390793                        | non synonymous coding           | G    | T       | L51V  | 548   | 1   |    | TM1 |
| 9390838                        | non synonymous coding           | A    | G       | V66I  | 524   | 22  | 3  | TM2 |
| 9391131                        | non synonymous coding           | G    | T       | V102G | 542   | 7   |    | TM3 |
| 9391763                        | non synonymous coding           | A    | C       | L129I | 2 546 | 1   |    | TM4 |
| 9391784                        | non synonymous coding           | G    | C       | L136V | 532   | 17  |    | TM4 |
| 9391929                        | intron:2 splice site acceptor:2 | C    | G       |       | 548   | 1   |    | —   |
| 9392295                        | non synonymous coding           | A    | G       | R211Q | 543   | 5   | 1  | —   |

**Figure S12 continue**

|         |                              |     |      |       |     |     |     |                   |
|---------|------------------------------|-----|------|-------|-----|-----|-----|-------------------|
| 9392311 | non synonymous coding        | T   | G    | E216D | 335 | 179 | 35  | —                 |
| 9392313 | non synonymous coding        | A   | G    | S217N | 548 | 1   |     | —                 |
| 9392319 | non synonymous coding        | A   | C    | T219N | 547 | 2   |     | —                 |
| 9392484 | frame shift                  | TCC | TC   | -250? | 6   | 523 | 20  | TM5               |
| 9392486 | non synonymous coding        | C   | G    | G250R | 9   | 411 | 129 | TM5               |
| 9392489 | non synonymous coding        | G   | T    | F251V | 7   | 513 | 29  | TM5               |
| 9392535 | non synonymous coding        | G   | T    | V266G | 1   | 546 | 2   | Additional<br>TM2 |
| 9392543 | non synonymous coding        | A   | G    | V269I | 344 | 174 | 31  | Additional<br>TM2 |
| 9393551 | non synonymous coding        | T   | G    | G290V | 548 | 1   |     | TM6               |
| 9393635 | non synonymous coding        | T   | C    | A294V | 532 | 17  |     | TM6               |
| 9393674 | non synonymous coding        | G   | A    | Q307R | 1   | 454 | 88  | 6                 |
| 9394638 | non synonymous coding        | T   | C    | A320V | 548 | 1   |     | TM7               |
| 9395547 | non synonymous coding        | G   | A    | T342A | 1   | 547 | 1   | —                 |
| 9395557 | non synonymous coding        | A   | G    | S345N | 548 | 1   |     | —                 |
| 9395561 | non synonymous coding        | A   | T    | H346Q | 548 | 1   |     | —                 |
| 9397186 | non synonymous coding        | C   | A    | Y357S | 548 | 1   |     | TM8               |
| 9397218 | non synonymous coding        | A   | G    | V368I | 548 | 1   |     | TM8               |
| 9397251 | non synonymous coding        | T   | G    | G379C | 548 | 1   |     | —                 |
| 9402781 | non synonymous coding        | T   | A    | I463L | 548 | 1   |     | —                 |
| 9402806 | non synonymous coding        | C   | T    | M471T | 548 | 1   |     | —                 |
| 9402833 | non synonymous coding        | T   | G    | G480V | 548 | 1   |     | —                 |
| 9402848 | non synonymous coding        | G   | A    | D485G | 548 | 1   |     | —                 |
| 9402937 | non synonymous coding        | A   | G    | G515S | 548 | 1   |     | —                 |
| 9404147 | non synonymous coding        | T   | A    | Q554L | 344 | 174 | 31  | —                 |
| 9404204 | non synonymous coding        | T   | A    | H573L | 548 | 1   |     | —                 |
| 9404240 | non synonymous coding        | T   | A    | N585I | 1   | 547 | 1   | —                 |
| 9406794 | non synonymous coding        | G   | A    | I646M | 548 | 1   |     | —                 |
| 9407050 | non synonymous coding        | A   | G    | R674H | 547 | 2   |     | —                 |
| 9407098 | non synonymous coding        | G   | T    | I690S | 548 | 1   |     | —                 |
| 9407319 | non synonymous coding        | C   | A    | H731P | 1   | 342 | 174 | 32                |
| 9407343 | non synonymous coding        | T   | C    | A739V | 2   | 546 | 1   | —                 |
| 9407378 | non synonymous coding        | T   | C    | R751C | 2   | 540 | 7   | —                 |
| 9407439 | non synonymous coding        | G   | A    | K771R | 1   | 547 | 1   | —                 |
| 9407458 | non synonymous coding        | A   | T    | N777K | 343 | 174 | 32  | —                 |
| 9407471 | non synonymous coding        | C   | A    | I782L | 1   | 541 | 7   | —                 |
| 9407605 | non synonymous coding        | C   | A    | S791R | 3   | 342 | 173 | 31                |
| 9407654 | non synonymous coding        | A   | G    | G807E | 1   | 547 | 1   | —                 |
| 9407712 | non synonymous coding        | G   | A    | I826M | 1   | 547 | 1   | —                 |
| 9407716 | non synonymous coding        | T   | G    | D828Y | 1   | 546 | 2   | —                 |
| 9407729 | non synonymous coding        | A   | T    | L832H | 343 | 175 | 31  | —                 |
| 9407738 | non synonymous coding        | G   | T    | F835C | 548 | 1   |     | —                 |
| 9407758 | frame shift                  | CT  | CTTT | -842  | 548 | 1   |     | —                 |
| 9407773 | non synonymous coding        | G   | T    | S847A | 548 | 1   |     | —                 |
| 9407807 | intron:2 splice site donor:2 | G   | T    |       | 1   | 413 | 135 | —                 |
| 9408180 | non synonymous coding        | T   | C    | P902L | 1   | 343 | 175 | 30                |
| 9408246 | non synonymous coding        | T   | C    | T924I | 346 | 172 | 31  | —                 |

**Figure S12 continue**

|               |                          |                         |   |        |     |     |     |     |
|---------------|--------------------------|-------------------------|---|--------|-----|-----|-----|-----|
| 9408251       | non synonymous coding    | C                       | T | S926P  | 351 | 167 | 31  | —   |
| 9409911       | non synonymous coding    | T                       | G | D971Y  | 1   | 546 | 2   | —   |
| 9409932       | non synonymous coding    | A                       | G | D978N  | 2   | 546 | 1   | —   |
| 9409950       | non synonymous coding    | G                       | A | R984G  |     | 547 | 2   | —   |
| 9409951       | non synonymous coding    | T                       | G | R984I  |     | 344 | 173 | 32  |
| 9409969       | non synonymous coding    | T                       | C | S990L  |     | 547 | 2   | —   |
| 9410004       | non synonymous coding    | T                       | C | H1002Y |     | 548 | 1   | —   |
| 9410044       | non synonymous coding    | A                       | C | P1015Q |     | 547 | 2   | —   |
| 9410053       | non synonymous coding    | T                       | G | R1018L |     | 515 | 31  | 3   |
| 9410073       | non synonymous coding    | C                       | A | T1025P | 1   | 547 | 1   | —   |
| 9410096       | non synonymous coding    | C                       | G | L1032F | 1   | 547 | 1   | —   |
| 9410124       | non synonymous coding    | A                       | T | F1042I | 1   | 547 | 1   | —   |
| 9410457       | non synonymous coding    | A                       | G | M1048I | 1   | 545 | 3   | —   |
| 9410482       | non synonymous coding    | A                       | G | G1057S |     | 526 | 20  | 3   |
| 9410497       | stop gained              | T                       | C | R1062* | 1   | 546 | 2   | —   |
| 9410531       | non synonymous coding    | T                       | C | S1073L |     | 548 | 1   | —   |
| 9410612       | non synonymous coding    | T                       | C | T1100I | 1   | 229 | 242 | 77  |
| 9410659       | non synonymous coding    | G                       | A | I1116V |     | 548 | 1   | —   |
| 9410725       | non synonymous coding    | T                       | A | R1138W |     | 539 | 10  | —   |
| <b>PtNHX8</b> |                          | <b>Potri.010G100900</b> |   |        |     |     |     |     |
| 12220655      | non synonymous coding    | C                       | T | S1139G |     | 548 | 1   | —   |
| 12220716      | non synonymous coding    | T                       | C | M1118I |     | 548 | 1   | —   |
| 12220723      | non synonymous coding    | C                       | T | H1116R | 1   | 544 | 4   | —   |
| 12220727      | non synonymous coding    | A                       | T | T1115S |     | 548 | 1   | —   |
| 12220731      | non synonymous coding    | T                       | A | N1113K |     | 548 | 1   | —   |
| 12220789      | non synonymous coding    | A                       | T | E1094V |     | 548 | 1   | —   |
| 12220793      | non synonymous coding    | T                       | G | L1093I |     | 548 | 1   | —   |
| 12220795      | non synonymous coding    | G                       | C | S1092T |     | 547 | 2   | —   |
| 12220811      | non synonymous coding    | C                       | T | T1087A |     | 104 | 257 | 188 |
| 12220844      | non synonymous coding    | C                       | G | R1076G | 2   | 390 | 140 | 17  |
| 12220913      | non synonymous coding    | C                       | T | S1053G |     | 547 | 2   | —   |
| 12221328      | non synonymous coding    | T                       | A | C1021S |     | 444 | 95  | 10  |
| 12221439      | non synonymous coding    | A                       | G | P984S  |     | 547 | 2   | —   |
| 12221456      | non synonymous coding    | T                       | C | G978D  |     | 548 | 1   | —   |
| 12221506      | non synonymous coding    | A                       | C | E961D  | 1   | 547 | 1   | —   |
| 12221537      | non synonymous coding    | G                       | A | F951S  | 1   | 547 | 1   | —   |
| 12223079      | non synonymous coding    | C                       | T | I943M  |     | 548 | 1   | —   |
| 12223107      | non synonymous coding    | A                       | C | G934V  |     | 548 | 1   | —   |
| 12223140      | non synonymous coding    | G                       | A | I923T  |     | 548 | 1   | —   |
| 12223249      | non synonymous coding    | C                       | T | R887G  | 1   | 547 | 1   | —   |
| 12223251      | non synonymous coding    | C                       | T | Q886R  | 1   | 393 | 142 | 13  |
| 12223279      | non synonymous coding    | T                       | A | L877M  |     | 548 | 1   | —   |
| 12223282      | non synonymous coding    | A                       | G | P876S  |     | 548 | 1   | —   |
| 12223285      | non synonymous coding    | A                       | T | M875L  |     | 548 | 1   | —   |
| 12223566      | intron splice site donor | C                       | A |        | 7   | 440 | 102 | —   |
| 12223591      | non synonymous coding    | T                       | C | A850T  |     | 548 | 1   | —   |
| 12223714      | non synonymous coding    | C                       | T | T809A  |     | 546 | 3   | —   |
| 12223744      | non synonymous coding    | A                       | C | A799S  |     | 547 | 2   | —   |
| 12223899      | non synonymous coding    | A                       | C | V786F  | 1   | 547 | 1   | —   |

**Figure S12 continue**

|          |                       |   |   |       |   |     |     |                   |
|----------|-----------------------|---|---|-------|---|-----|-----|-------------------|
| 12223932 | non synonymous coding | C | T | K775E | 1 | 547 | 1   | —                 |
| 12223955 | non synonymous coding | G | A | V767A | 1 | 547 | 1   | —                 |
| 12224226 | non synonymous coding | G | C | K705N |   | 548 | 1   | —                 |
| 12224264 | non synonymous coding | T | C | V693I |   | 529 | 19  | 1                 |
| 12224272 | non synonymous coding | G | A | I690T |   | 548 | 1   | —                 |
| 12228138 | non synonymous coding | T | C | R632Q |   | 446 | 94  | 9                 |
| 12228251 | non synonymous coding | T | G | F594L | 1 | 544 | 4   | —                 |
| 12228328 | non synonymous coding | G | C | D569H |   | 548 | 1   | —                 |
| 12228331 | non synonymous coding | A | T | I568F |   | 444 | 94  | 11                |
| 12228409 | non synonymous coding | T | C | A542T |   | 539 | 9   | 1                 |
| 12229610 | non synonymous coding | T | G | R534S |   | 548 | 1   | —                 |
| 12229613 | non synonymous coding | T | A | L533I |   | 548 | 1   | —                 |
| 12229630 | non synonymous coding | G | T | N527T |   | 548 | 1   | —                 |
| 12229654 | non synonymous coding | A | G | A519V |   | 548 | 1   | —                 |
| 12229670 | non synonymous coding | A | G | H514Y |   | 547 | 2   | —                 |
| 12229694 | non synonymous coding | T | A | L506M |   | 548 | 1   | —                 |
| 12229727 | non synonymous coding | A | T | T495S | 1 | 547 | 1   | —                 |
| 12229811 | non synonymous coding | A | T | T467S |   | 548 | 1   | —                 |
| 12230379 | non synonymous coding | A | G | A458V |   | 532 | 17  | —                 |
| 12230452 | non synonymous coding | T | G | L434I |   | 548 | 1   | TM10              |
| 12230464 | non synonymous coding | A | C | G430C |   | 548 | 1   | TM10              |
| 12231126 | non synonymous coding | G | C | A398P | 1 | 547 | 1   | TM9               |
| 12231137 | non synonymous coding | G | C | G394A | 1 | 547 | 1   | TM9               |
| 12231150 | non synonymous coding | T | G | L390I | 1 | 520 | 27  | 1                 |
| 12231239 | non synonymous coding | G | A | V360A |   | 548 | 1   | TM8               |
| 12231246 | non synonymous coding | C | T | I358V |   | 548 | 1   | TM8               |
| 12231258 | non synonymous coding | G | A | F354L |   | 548 | 1   | TM8               |
| 12235111 | non synonymous coding | T | C | A300T |   | 548 | 1   | TM6               |
| 12235116 | non synonymous coding | G | C | R298T |   | 547 | 2   | TM6               |
| 12235253 | non synonymous coding | A | C | E276D |   | 546 | 3   | —                 |
| 12236291 | non synonymous coding | C | A | F251V | 6 | 398 | 145 | TM5               |
| 12236294 | non synonymous coding | G | C | G250R | 6 | 524 | 19  | TM5               |
| 12236434 | non synonymous coding | A | G | T228I |   | 544 | 5   | —                 |
| 12236456 | non synonymous coding | A | C | V221F |   | 548 | 1   | —                 |
| 12236515 | non synonymous coding | A | G | T201I |   | 548 | 1   | —                 |
| 12236717 | non synonymous coding | T | G | S195Y | 1 | 545 | 3   | —                 |
| 12236780 | non synonymous coding | G | A | V174A |   | 547 | 2   | Additional<br>TM1 |
| 12236837 | non synonymous coding | C | T | N155S |   | 547 | 2   | —                 |
| 12236969 | non synonymous coding | C | T | I137V |   | 495 | 51  | 3                 |
| 12237535 | non synonymous coding | C | A | F109L |   | 548 | 1   | TM3               |
| 12237557 | non synonymous coding | C | A | V102G |   | 532 | 17  | TM3               |
| 12237579 | non synonymous coding | T | C | D95N  | 1 | 441 | 98  | 9                 |
| 12237699 | non synonymous coding | C | T | D86G  | 2 | 395 | 136 | 16                |
| 12237904 | non synonymous coding | T | C | R49K  | 1 | 546 | 2   | TM1               |
| 12238012 | non synonymous coding | C | T | Y13C  |   | 548 | 1   | —                 |
| 12238085 | start gained          | C | T |       |   | 548 | 1   | —                 |

**Supplementary Tables:**

**Table S1. List of NHX genes and their coding amino acid sequences identified from *P. trichocarpa*, *E. grandis*, *V. vinifera*, *A. thaliana*, *M. truncatula*, *G. max*, *O. sativa*, *S. bicolor*, *B. distachyon*, *Z. mays*, and *P. patens*.**

**Table S2. The sequences of qRT-PCR primers.**

**Table S3. GO enrichment analysis of genes co-expressed with *AtNHXs*.**

**Figure S1. Nucleotide and amino acid sequences of selected three *PtNHXs* (-1, -6, and -8) from three major groups cloned from *P. trichocarpa*.**

The three cloned *PtNHXs* (-1, -6, and -8) showed 99.45%, 99.57%, and 99.54% identities with their corresponding CDS sequences from the *P. trichocarpa* genome database, respectively.

**Figure S2. *Arabidopsis NHX* map position and duplication analysis.**

(A) Schematic representation of *Arabidopsis* chromosomes showing the location of *AtNHX* genes.

(B) The duplicated *AtNHX* genes (red labelled) on *Arabidopsis* chromosomes.

**Figure S3. Sliding window analysis of duplicated *PtNHXs*.**

The window size 60 and 90 bp were used for *Ka/Ks* analysis. The sequence identities and TM regions were shown in bottom of each figure.

**Figure S4. Details of motifs in *AtNHXs* and *PtNHXs* identified by MEME.**

**Figure S5. Multiple sequence alignment and transmembrane region of *PtNHXs*.**

**Figure S6. Details of secondary structure of *PtNHX* proteins.**

**Figure S7. Expression patterns of *Arabidopsis NHX* genes across different tissues.**

The data was obtained from AtGenExpress Visualization Tool (<http://weigelworld.org/resources>).

**Figure S8. Expression patterns of *Arabidopsis NHX* genes under various abiotic stresses.**

The microarray data was obtained from AtGenExpress Visualization Tool. Red means highly expression and green indicates low expression.

**Figure S9. GO enrichment analysis of genes co-expressed with *PtNHXs***

**Figure S10. Co-expression network of *Arabidopsis NHX* genes.**

**Figure S11. GO enrichment analysis of *PtNHX* PPI network.**

**Figure S12. Details of SNPs located in *PtNHXs*.**

**Table S1. List of *NHX* genes and their coding amino acid sequences identified from *P. trichocarpa*, *E. grandis*, *V. vinifera*, *A. thaliana*, *M. truncatula*, *G. max*, *O. sativa*, *S. bicolor*, *B. distachyon*, *Z. mays*, and *P. patens*.**

**Table S2. The sequences of qRT-PCR primers.**

**Table S3. GO enrichment analysis of genes co-expressed with *AtNHXs*.**
